# Supplementary material for: A synergistic nanoformulation of propolis and chlorhexidine against Acanthamoeba: encapsulation efficiency, release kinetics, and safety evaluation
Source: PeerJ. 2025 Dec 19;13:e20493. doi: 10.7717/peerj.20493 (PMC12721124; doi:10.7717/peerj.20493)
Supplement: Supplemental Information 2 [file peerj-13-20493-s002.xlsx]

## Sheet: Drug Release
Cummulative Release (Triplets)
Time	CR 1.1	CR 1.2	CR 1.3	Cummulative Release (%) (1)	CR 2.1	CR 2.2	CR 2.3	Cummulative Release (%) (2)	CR 3.1	CR 3.2	CR 3.3	Cummulative Release (%) (3)	CR 4.1	CR 4.2	CR 4.3	Cummulative Release (%) (4)	CR 5.1	CR 5.2	CR 5.3	Cummulative Release (%) (5)	CR 6.1	CR 6.2	CR 6.3	Cummulative Release (%) (6)	CR 7.1	CR 7.2	CR 7.3	Cummulative Release (%) (7)	CR 8.1	CR 8.2	CR 8.3	Cummulative Release (%) (8)	CR 9.1	CR 9.2	CR 9.3	Cummulative Release (%) (9)	CR 10.1	CR 10.2	CR 10.3	Cummulative Release (%) (10)	CR 11.1	CR 11.2	CR 11.3	Cummulative Release (%) (11)
0	0	0	0	0	0	0	0	0	0	0	0	0	0	0	0	0	0	0	0	0	0	0	0	0	0	0	0	0	0	0	0	0	0	0	0	0	0	0	0	0	0	0	0	0
2	15.4645	15.6215	16.014	15.7	17.7842	17.9647	18.4161	18.055	18.0061	18.199	18.6563	18.2871	18.1399	18.324	18.7844	18.4161	18.2017	18.3865	18.8485	18.4789	18.2945	18.4802	18.9446	18.5731	18.3564	18.5427	19.0086	18.6359	18.4801	18.6677	19.1367	18.7615	18.5806	18.7693	19.2408	18.8636	18.7198	18.9103	19.3849	19.005	18.7894	18.9801	19.457	19.0755
4	17.4345	17.6115	18.054	17.7	20.0497	20.2532	20.7621	20.355	20.3112	20.5174	21.0329	20.6205	20.4507	20.6583	21.1773	20.7621	20.5204	20.7287	21.2496	20.8329	20.625	20.8343	21.3579	20.9391	20.6948	20.9049	21.4301	21.0099	20.8342	21.0457	21.5745	21.1515	20.9475	21.1602	21.6919	21.2665	21.1045	21.3187	21.8544	21.4259	21.1829	21.403	21.9356	21.5072
6	24.1325	24.3775	24.99	24.5	27.7524	28.0341	28.7385	28.175	28.1144	28.3998	29.1134	28.5425	28.3074	28.5948	29.3133	28.7385	28.404	28.6923	29.4132	28.8365	28.5487	28.8386	29.5632	28.9835	28.6453	28.9361	29.6631	29.0815	28.8383	29.1311	29.8631	29.2775	28.9952	29.2896	30.0255	29.4368	29.2124	29.509	30.2504	29.6573	29.321	29.6187	30.3629	29.7675
8	29.3333	29.6311	30.3756	29.78	33.7333	34.0758	34.9319	34.247	34.1733	34.5202	35.3876	34.6937	34.408	34.7573	35.6306	34.932	34.5253	34.8758	35.7521	35.0511	34.7013	35.0536	35.9343	35.2297	34.8186	35.1721	36.0558	35.3488	35.0533	35.4092	36.2988	35.5871	35.2439	35.6018	36.4963	35.7807	35.508	35.8684	36.7697	36.0487	35.64	36.0018	36.9064	36.1827
10	33.1748	33.5116	34.3536	33.68	38.151	38.5383	39.5066	38.732	38.6486	39.041	40.0219	39.2372	38.914	39.3091	40.2968	39.5066	39.0467	39.4432	40.4342	39.6414	39.2458	39.6442	40.6403	39.8434	39.3784	39.7783	40.7777	39.9781	39.6439	40.0464	41.0526	40.2476	39.8595	40.2642	41.2758	40.4665	40.1581	40.5658	41.585	40.7696	40.3074	40.7166	41.7396	40.9212
12	41.3748	41.7847	42.8346	41.998	47.5695	48.0525	49.2598	48.2939	48.19	48.6792	49.9023	48.9238	48.5209	49.0135	50.245	49.2598	48.6863	49.1806	50.4163	49.4277	48.9045	49.4313	50.6733	49.6697	49.1	49.5985	50.8447	49.8477	49.4309	49.9329	51.1873	50.1837	49.6998	50.2043	51.4658	50.4566	50.0721	50.5804	51.8513	50.8346	50.2582	50.7684	52.044	51.0235
14	49.8016	50.3072	51.5712	50.56	49.3603	49.8614	51.1142	50.112	58.0189	58.6079	60.0804	58.9024	58.4373	59.0103	60.493	59.3135	58.6165	59.2116	60.6993	59.5091	58.9153	59.5134	60.0087	59.4791	59.1145	59.7146	61.215	60.0147	59.5129	60.1171	61.6276	60.4192	59.8366	60.4441	61.9628	60.7478	60.2858	60.8969	62.4269	61.2032	60.5089	61.1232	62.659	61.4304
16	53.1649	53.7046	55.054	53.9745	53.4363	53.9788	55.335	54.25	61.9371	62.5659	64.1379	62.8803	62.3624	62.9955	64.5783	63.3121	62.5751	63.2103	64.7986	63.528	62.8941	63.5326	65.1289	63.8519	63.1067	63.7474	65.3491	64.0677	63.532	64.177	65.7895	64.4995	63.8776	64.5261	66.1474	64.8504	64.3561	65.0094	66.6429	65.3361	64.5953	65.2511	66.8906	65.579
18	58.5356	59.1299	60.6155	59.427	58.6666	59.2622	60.7512	59.56	68.1638	68.8863	70.6171	69.2224	68.6623	69.3593	71.102	69.7079	68.8964	69.5959	71.3445	69.9456	69.2476	69.9506	71.7082	70.3021	69.4818	70.1872	71.9506	70.5399	69.95	70.6602	72.4356	71.0153	70.3305	71.0445	72.8296	71.4015	70.8573	71.5767	73.3751	71.9364	71.1208	71.8428	73.6479	72.2038
20	64.8422	65.45	67.0945	65.7956	64.222	64.874	66.504	65.2	75.4829	76.2493	78.1651	76.6324	75.9613	76.7729	78.7018	77.1453	76.2604	77.0347	78.9702	77.4218	76.6492	77.4274	79.3728	77.8165	76.9084	77.6892	79.6411	78.0796	77.4267	78.2128	80.1779	78.6058	77.8479	78.6382	80.614	79.0334	78.431	79.2272	81.2179	79.6254	78.7225	79.5218	81.5198	79.9214
22	71.469	72.1946	74.0085	72.5574	70.4565	71.1724	72.9606	71.5298	83.2614	84.1067	86.22	84.5294	83.8332	84.6843	86.812	85.1098	84.0691	84.9731	87.1081	85.3834	84.5479	85.4062	87.5521	85.8354	84.8337	85.695	87.8481	86.1256	85.4055	86.2726	88.4402	86.7061	85.8701	86.7418	88.9213	87.1777	86.5133	87.3916	89.5873	87.8307	86.8349	87.7165	89.9204	88.1573
24	78.1546	78.9481	80.9317	79.3448	79.0955	79.8985	81.906	80.3	91.0101	91.9745	94.2854	92.4233	91.6754	92.6061	94.9329	93.0715	91.988	92.9219	95.2566	93.3888	92.397	93.3956	95.7422	93.8449	92.7695	93.7114	96.0665	94.1825	93.3948	94.343	96.7134	94.8171	93.9028	94.8561	97.2394	95.3328	94.6062	95.5666	97.9678	96.0469	94.9579	95.9219	98.332	96.4039
Cummulative Release (Average value)
Time	C1	C2	C3	C4	C5	C6	C7	C8	C9	C10	C11
0	0	0	0	0	0	0	0	0	0	0	0
2	15.7	18.055	18.2871	18.4161	18.4789	18.5731	18.6359	18.7615	18.8636	19.005	19.0755
4	17.7	20.355	20.6205	20.7621	20.8329	20.9391	21.0099	21.1515	21.2665	21.4259	21.5072
6	24.5	28.175	28.5425	28.7385	28.8365	28.9835	29.0815	29.2775	29.4368	29.6573	29.7675
8	29.78	34.247	34.6937	34.932	35.0511	35.2297	35.3488	35.5871	35.7807	36.0487	36.1827
10	33.68	38.732	39.2372	39.5066	39.6414	39.8434	39.9781	40.2476	40.4665	40.7696	40.9212
12	41.998	48.2939	48.9238	49.2598	49.4277	49.6697	49.8477	50.1837	50.4566	50.8346	51.0235
14	50.56	50.112	58.9024	59.3135	59.5091	59.4791	60.0147	60.4192	60.7478	61.2032	61.4304
16	53.9745	54.25	62.8803	63.3121	63.528	63.8519	64.0677	64.4995	64.8504	65.3361	65.579
18	59.427	59.56	69.2224	69.7079	69.9456	70.3021	70.5399	71.0153	71.4015	71.9364	72.2038
20	65.7956	65.2	76.6324	77.1453	77.4218	77.8165	78.0796	78.6058	79.0334	79.6254	79.9214
22	72.5574	71.5298	84.5294	85.1098	85.3834	85.8354	86.1256	86.7061	87.1777	87.8307	88.1573
24	79.3448	80.3	92.4233	93.0715	93.3888	93.8449	94.1825	94.8171	95.3328	96.0469	96.4039

## Sheet: Encapsulation
Encapsulation Efficiency
	T1	T2	T3	Average	Stdev	Ttest
C1	92.6	90.2	88.04	90.28	2.28105	0.185443
C2	88.23	87.12	90.17	88.5067	1.54371	0.532296
C3	90.75	91.23	87.19	89.7233	2.20702	0.224812
C4	83.05	86.41	82.64	84.0333	2.06844	0.255699
C5	87.8	91.254	90.14	89.7313	1.76289	0.245064
C6	88.11	90.46	89.59	89.3867	1.18812	0.238156
C7	90.72	86.23	88.697	88.549	2.24866	0.305159
C8	79.38	83.51	81.25	81.38	2.06807	0.11058
C9	81.13	88.31	85.56	85	3.62261	0.510683
C10	87.25	80.12	81.56	82.9767	3.7702	0.0196781
C11	93.71	90.14	92.33	92.06	1.80025	0.0276013
								.

## Sheet: pH
pH Release (Triplets)
Time	T1	T2	T3	pH 3	T1	T2	T3	pH 5	T1	T2	T3	pH 7
0	0	0	0	0	0	0	0	0	0	0	0	0
2	12.608	12.736	13.056	12.8	9.653	9.751	9.996	9.8	15.4645	15.6215	16.014	15.7
4	21.867	22.089	22.644	22.2	12.1155	12.2385	12.546	12.3	17.4345	17.6115	18.054	17.7
6	29.0575	29.3525	30.09	29.5	18.6165	18.8055	19.278	18.9	24.1325	24.3775	24.99	24.5
8	37.8733	38.2578	39.219	38.45	20.3501	20.5567	21.0732	20.66	29.3333	29.6311	30.3756	29.78
10	46.1571	46.6257	47.7972	46.86	28.4271	28.7157	29.4372	28.86	33.1748	33.5116	34.3536	33.68
12	64.222	64.874	66.504	65.2	37.3713	37.7493	38.6988	37.9398	41.3748	41.7847	42.8346	41.998
14	73.1855	73.9285	75.786	74.3	46.0583	46.5461	47.7156	46.7733	49.8016	50.3072	51.5712	50.56
16	79.9816	80.8239	82.8546	81.22	58.903	59.501	60.996	59.8	53.1649	53.7046	55.054	53.9745
18	86.6702	87.5501	89.7498	87.99	71.117	71.839	73.644	72.2	58.5356	59.1299	60.6155	59.427
20	88.9849	89.8883	92.1468	90.34	77.8052	78.5951	80.5698	78.99	64.8422	65.45	67.0945	65.7956
22	91.8217	92.7539	95.0844	93.22	83.8461	84.6974	86.8255	85.123	71.469	72.1946	74.0085	72.5574
24	91.8611	92.7937	95.1252	93.26	86.0989	86.973	89.1582	87.41	78.1546	78.9481	80.9317	79.3448
26	92.3438	93.2813	95.625	93.75	90.7185	91.6395	93.942	92.1	80.05	80.8626	82.8944	81.269
28	92.7082	93.6494	96.0024	94.12	91.5355	92.4654	94.7886	92.9298	84.2175	85.0725	87.21	85.5
30	92.7181	93.6594	96.0126	94.13	92.0778	92.9626	95.3496	93.4633	88.6352	89.5401	91.7898	89.9884
32	92.9742	93.9181	96.2778	94.39	92.8067	93.7489	96.1044	94.22	89.8911	90.8037	93.0852	91.26
34	93.3288	94.2763	96.645	94.75	92.8363	93.7788	96.135	94.25	91.143	92.0682	94.3816	92.5309
36	93.3583	94.3061	96.6756	94.78	92.8363	93.7788	96.135	94.25	92.3713	93.3091	95.6536	93.778
Average Values
Time	pH 3	pH 5	pH 7.4
0	0	0	0
2	12.8	9.8	15.7
4	22.2	12.3	17.7
6	29.5	18.9	24.5
8	38.45	20.66	29.78
10	46.86	28.86	33.68
12	65.2	37.9398	41.998
14	74.3	46.7733	50.56
16	81.22	59.8	53.9745
18	87.99	72.2	59.427
20	90.34	78.99	65.7956
22	93.22	85.123	72.5574
24	93.26	87.41	79.3448
26	93.75	92.1	81.269
28	94.12	92.9298	85.5
30	94.13	93.4633	89.9884
32	94.39	94.22	91.26
34	94.75	94.25	92.5309
36	94.78	94.25	93.778
