# Supplementary material for: A synergistic nanoformulation of propolis and chlorhexidine against Acanthamoeba: encapsulation efficiency, release kinetics, and safety evaluation
Source: PeerJ. 2025 Dec 19;13:e20493. doi: 10.7717/peerj.20493 (PMC12721124; doi:10.7717/peerj.20493)
Supplement: Supplemental Information 3 [file peerj-13-20493-s003.xlsx]

## Sheet: Samples from Dr. Shamugar
	CS-NPs	Combination
	C1	Propolis 1 +2 + 3
	C2	Propolis 1 + 2
	C3	Propolis 1 + 3
	C4	Propolis 2 + 3
	C5	Propolis 1
	C6	Propolis 2
	C7	Propolis 3
	C8	Propolis 1 +2 + 3 + Chlorhexidine
	C9	Propolis 1 +2 + Chlorhexidine
	C10	Propolis 1 +3 + Chlorhexidine
	C11	Propolis 2 +3 + Chlorhexidine

## Sheet: Propolis combination-CS NP-AC3
Propolis ethanolic extracts (Propolis combination CS NP)	Stock conc.	Solubility	Final conc.	Number of Acanthamoeba cells			Acanthamoeba viability (%)			Acanthamoeba inhibition (%)					MITC (%) Trop AC3	Propolis ethanolic extracts (Propolis combination CS NP)	Stock conc.	Solubility	Final conc.	Number of Acanthamoeba cells			Acanthamoeba viability (%)			Acanthamoeba inhibition (%)					MICC (%) Cyst AC3
				Trophozoite form			Trophozoite form			Trophozoite form										Cystform			Cystform			Cystform
				A.castellanii ATCC30010			A.castellanii ATCC30010			A.castellanii ATCC30010										A.castellanii ATCC30010			A.castellanii ATCC30010			A.castellanii ATCC30010
				1	2	3	1	2	3	1	2	3	Mean	SD						1	2	3	1	2	3	1	2	3	Mean	SD
Untreated Acanthamoeba	N/A	N/A	N/A													Untreated Acanthamoeba	N/A	N/A	N/A
0.05% Acetic acid (Neg. conrol)	0.001	DI	0.0005	43	46	45										0.05% Acetic acid (Neg. conrol)	0.001	DI	0.0005	50	49	45	#DIV/0!	#DIV/0!	#DIV/0!	#DIV/0!	#DIV/0!	#DIV/0!	#DIV/0!	#DIV/0!
CHX 8 µg/mL (Pos. control)	32 mg/mL	N/A	8 µg/mL	0	0	0	0	0	0	100	100	100	100	0		CHX 8 µg/mL (Pos. control)	32 mg/mL	N/A	128 µg/mL	0	0	0	0	0	0	100	100	100	100	0
C1-CS NP	100 mg/mL	0.1% Acetic acid	0.05	25	24	22	58.1395	52.1739	48.8889	41.8605	47.8261	51.1111	46.9326	4.68961	>5%	C1-CS NP	100 mg/mL	0.1% Acetic acid	0.05	5	6	5	10	12.2449	11.1111	90	87.7551	88.8889	88.8813	1.12247	0.05
C1-CS NP	100 mg/mL	0.1% Acetic acid	0.025	44	40	43	102.326	86.9565	95.5556	-2.32558	13.0435	4.44444	5.05411	7.70265		C1-CS NP	100 mg/mL	0.1% Acetic acid	0.025	9	8	9	18	16.3265	20	82	83.6735	80	81.8912	1.83915
C1-CS NP	100 mg/mL	0.1% Acetic acid	0.0125	40	46	45	93.0233	100	100	6.97674	0	0	2.32558	4.02803		C1-CS NP	100 mg/mL	0.1% Acetic acid	0.0125	33	30	35	66	61.2245	77.7778	34	38.7755	22.2222	31.6659	8.51991
C1-CS NP	100 mg/mL	0.1% Acetic acid	0.00625	40	42	44	93.0233	91.3043	97.7778	6.97674	8.69565	2.22222	5.96487	3.35324		C1-CS NP	100 mg/mL	0.1% Acetic acid	0.00625	33	35	30	66	71.4286	66.6667	34	28.5714	33.3333	31.9683	2.96056
C2-CS NP	100 mg/mL	0.1% Acetic acid	0.05	15	14	13	34.8837	30.4348	28.8889	65.1163	69.5652	71.1111	68.5975	3.11236	>5%	C2-CS NP	100 mg/mL	0.1% Acetic acid	0.05	33	33	30	66	67.3469	66.6667	34	32.6531	33.3333	33.3288	0.673481	>5%
C2-CS NP	100 mg/mL	0.1% Acetic acid	0.025	29	27	30	67.4419	58.6957	66.6667	32.5581	41.3043	33.3333	35.7319	4.84139		C2-CS NP	100 mg/mL	0.1% Acetic acid	0.025	29	29	31	58	59.1837	68.8889	42	40.8163	31.1111	37.9758	5.97439
C2-CS NP	100 mg/mL	0.1% Acetic acid	0.0125	42	40	43	97.6744	86.9565	95.5556	2.32558	13.0435	4.44444	6.6045	5.67606		C2-CS NP	100 mg/mL	0.1% Acetic acid	0.0125	27	27	25	54	55.102	55.5556	46	44.898	44.4444	45.1141	0.799992
C2-CS NP	100 mg/mL	0.1% Acetic acid	0.00625	43	46	40	100	100	88.8889	0	0	11.1111	3.7037	6.415		C2-CS NP	100 mg/mL	0.1% Acetic acid	0.00625	49	48	40	98	97.9592	88.8889	2	2.04082	11.1111	5.05064	5.24856
C3-CS NP	100 mg/mL	0.1% Acetic acid	0.05	20	21	19	46.5116	45.6522	42.2222	53.4884	54.3478	57.7778	55.2047	2.26944	>5%	C3-CS NP	100 mg/mL	0.1% Acetic acid	0.05	33	35	36	66	71.4286	80	34	28.5714	20	27.5238	7.05855	>5%
C3-CS NP	100 mg/mL	0.1% Acetic acid	0.025	43	44	40	100	95.6522	88.8889	0	4.34783	11.1111	5.15298	5.59914		C3-CS NP	100 mg/mL	0.1% Acetic acid	0.025	36	38	41	72	77.551	91.1111	28	22.449	8.88889	19.7793	9.83128
C3-CS NP	100 mg/mL	0.1% Acetic acid	0.0125	44	43	45	102.326	93.4783	100	-2.32558	6.52174	0	1.39872	4.58651		C3-CS NP	100 mg/mL	0.1% Acetic acid	0.0125	40	44	44	80	89.7959	97.7778	20	10.2041	2.22222	10.8088	8.9043
C3-CS NP	100 mg/mL	0.1% Acetic acid	0.00625	45	46	45	104.651	100	100	-4.65116	0	0	-1.55039	2.68535		C3-CS NP	100 mg/mL	0.1% Acetic acid	0.00625	43	48	42	86	97.9592	93.3333	14	2.04082	6.66667	7.56916	6.03046
C4-CS NP	100 mg/mL	0.1% Acetic acid	0.05	34	33	36	79.0698	71.7391	80	20.9302	28.2609	20	23.0637	4.52485	>5%	C4-CS NP	100 mg/mL	0.1% Acetic acid	0.05	28	30	29	56	61.2245	64.4444	44	38.7755	35.5556	39.4437	4.26169	>5%
C4-CS NP	100 mg/mL	0.1% Acetic acid	0.025	38	40	39	88.3721	86.9565	86.6667	11.6279	13.0435	13.3333	12.6682	0.912536		C4-CS NP	100 mg/mL	0.1% Acetic acid	0.025	36	40	41	72	81.6327	91.1111	28	18.3673	8.88889	18.4187	9.55566
C4-CS NP	100 mg/mL	0.1% Acetic acid	0.0125	44	45	43	102.326	97.8261	95.5556	-2.32558	2.17391	4.44444	1.43093	3.44563		C4-CS NP	100 mg/mL	0.1% Acetic acid	0.0125	38	39	40	76	79.5918	88.8889	24	20.4082	11.1111	18.5064	6.65157
C4-CS NP	100 mg/mL	0.1% Acetic acid	0.00625	48	45	45	111.628	97.8261	100	-11.6279	2.17391	0	-3.15133	7.42097		C4-CS NP	100 mg/mL	0.1% Acetic acid	0.00625	50	48	49	100	97.9592	108.889	0	2.04082	-8.88889	-2.28269	5.81142
C5-CS NP	100 mg/mL	0.1% Acetic acid	0.05	26	28	29	60.4651	60.8696	64.4444	39.5349	39.1304	35.5556	38.0736	2.19007	>5%	C5-CS NP	100 mg/mL	0.1% Acetic acid	0.05	20	22	21	40	44.898	46.6667	60	55.102	53.3333	56.1451	3.45357	>5%
C5-CS NP	100 mg/mL	0.1% Acetic acid	0.025	33	35	34	76.7442	76.087	75.5556	23.2558	23.913	24.4444	23.8711	0.595424		C5-CS NP	100 mg/mL	0.1% Acetic acid	0.025	22	25	26	44	51.0204	57.7778	56	48.9796	42.2222	49.0673	6.88931
C5-CS NP	100 mg/mL	0.1% Acetic acid	0.0125	38	37	35	88.3721	80.4348	77.7778	11.6279	19.5652	22.2222	17.8051	5.51211		C5-CS NP	100 mg/mL	0.1% Acetic acid	0.0125	24	20	24	48	40.8163	53.3333	52	59.1837	46.6667	52.6168	6.28126
C5-CS NP	100 mg/mL	0.1% Acetic acid	0.00625	43	44	42	100	95.6522	93.3333	0	4.34783	6.66667	3.6715	3.3844		C5-CS NP	100 mg/mL	0.1% Acetic acid	0.00625	38	40	39	76	81.6327	86.6667	24	18.3673	13.3333	18.5669	5.33613
C6-CS NP	100 mg/mL	0.1% Acetic acid	0.05	36	35	38	83.7209	76.087	84.4444	16.2791	23.913	15.5556	18.5826	4.63049	>5%	C6-CS NP	100 mg/mL	0.1% Acetic acid	0.05	32	31	33	64	63.2653	73.3333	36	36.7347	26.6667	33.1338	5.61272	>5%
C6-CS NP	100 mg/mL	0.1% Acetic acid	0.025	40	40	41	93.0233	86.9565	91.1111	6.97674	13.0435	8.88889	9.63637	3.10167		C6-CS NP	100 mg/mL	0.1% Acetic acid	0.025	38	39	40	76	79.5918	88.8889	24	20.4082	11.1111	18.5064	6.65157
C6-CS NP	100 mg/mL	0.1% Acetic acid	0.0125	42	43	40	97.6744	93.4783	88.8889	2.32558	6.52174	11.1111	6.65281	4.39423		C6-CS NP	100 mg/mL	0.1% Acetic acid	0.0125	46	47	49	92	95.9184	108.889	8	4.08163	-8.88889	1.06425	8.83952
C6-CS NP	100 mg/mL	0.1% Acetic acid	0.00625	43	42	41	100	91.3043	91.1111	0	8.69565	8.88889	5.86151	5.07714		C6-CS NP	100 mg/mL	0.1% Acetic acid	0.00625	50	45	50	100	91.8367	111.111	0	8.16327	-11.1111	-0.982615	9.67469
C7-CS NP	100 mg/mL	0.1% Acetic acid	0.05	15	12	14	34.8837	26.087	31.1111	65.1163	73.913	68.8889	69.3061	4.4132	>5%	C7-CS NP	100 mg/mL	0.1% Acetic acid	0.05	38	40	36	76	81.6327	80	24	18.3673	20	20.7891	2.89805	>5%
C7-CS NP	100 mg/mL	0.1% Acetic acid	0.025	26	29	33	60.4651	63.0435	73.3333	39.5349	36.9565	26.6667	34.386	6.80833		C7-CS NP	100 mg/mL	0.1% Acetic acid	0.025	46	45	47	92	91.8367	104.444	8	8.16327	-4.44444	3.90627	7.23239
C7-CS NP	100 mg/mL	0.1% Acetic acid	0.0125	34	36	40	79.0698	78.2609	88.8889	20.9302	21.7391	11.1111	17.9268	5.91642		C7-CS NP	100 mg/mL	0.1% Acetic acid	0.0125	44	43	42	88	87.7551	93.3333	12	12.2449	6.66667	10.3039	3.15228
C7-CS NP	100 mg/mL	0.1% Acetic acid	0.00625	43	46	46	100	100	102.222	0	0	-2.22222	-0.740741	1.283		C7-CS NP	100 mg/mL	0.1% Acetic acid	0.00625	50	49	47	100	100	104.444	0	0	-4.44444	-1.48148	2.566
C8-CS NP	100 mg/mL	0.1% Acetic acid	0.05	26	24	25	60.4651	52.1739	55.5556	39.5349	47.8261	44.4444	43.9351	4.169	>5%	C8-CS NP	100 mg/mL	0.1% Acetic acid	0.05	5	4	5	10	8.16327	11.1111	90	91.8367	88.8889	90.2419	1.48873	0.05
C8-CS NP	100 mg/mL	0.1% Acetic acid	0.025	32	33	38	74.4186	71.7391	84.4444	25.5814	28.2609	15.5556	23.1326	6.69729		C8-CS NP	100 mg/mL	0.1% Acetic acid	0.025	22	25	26	44	51.0204	57.7778	56	48.9796	42.2222	49.0673	6.88931
C8-CS NP	100 mg/mL	0.1% Acetic acid	0.0125	37	38	40	86.0465	82.6087	88.8889	13.9535	17.3913	11.1111	14.152	3.1448		C8-CS NP	100 mg/mL	0.1% Acetic acid	0.0125	34	35	38	68	71.4286	84.4444	32	28.5714	15.5556	25.3757	8.67552
C8-CS NP	100 mg/mL	0.1% Acetic acid	0.00625	50	45	48	116.279	97.8261	106.667	-16.2791	2.17391	-6.66667	-6.92394	9.22918		C8-CS NP	100 mg/mL	0.1% Acetic acid	0.00625	40	42	41	80	85.7143	91.1111	20	14.2857	8.88889	14.3915	5.55631
C9-CS NP	100 mg/mL	0.1% Acetic acid	0.05	30	32	33	69.7674	69.5652	73.3333	30.2326	30.4348	26.6667	29.1113	2.11956	>5%	C9-CS NP	100 mg/mL	0.1% Acetic acid	0.05	2	3	3	4	6.12245	6.66667	96	93.8776	93.3333	94.4036	1.40902	0.05
C9-CS NP	100 mg/mL	0.1% Acetic acid	0.025	35	35	38	81.3953	76.087	84.4444	18.6047	23.913	15.5556	19.3578	4.22933		C9-CS NP	100 mg/mL	0.1% Acetic acid	0.025	25	24	28	50	48.9796	62.2222	50	51.0204	37.7778	46.2661	7.36875
C9-CS NP	100 mg/mL	0.1% Acetic acid	0.0125	39	39	41	90.6977	84.7826	91.1111	9.30233	15.2174	8.88889	11.1362	3.54045		C9-CS NP	100 mg/mL	0.1% Acetic acid	0.0125	40	40	42	80	81.6327	93.3333	20	18.3673	6.66667	15.0113	7.27266
C9-CS NP	100 mg/mL	0.1% Acetic acid	0.00625	45	46	48	104.651	100	106.667	-4.65116	0	-6.66667	-3.77261	3.41906		C9-CS NP	100 mg/mL	0.1% Acetic acid	0.00625	46	45	46	92	91.8367	102.222	8	8.16327	-2.22222	4.64701	5.94949
C10-CS NP	100 mg/mL	0.1% Acetic acid	0.05	28	30	29	65.1163	65.2174	64.4444	34.8837	34.7826	35.5556	35.074	0.420125	>5%	C10-CS NP	100 mg/mL	0.1% Acetic acid	0.05	3	3	4	6	6.12245	8.88889	94	93.8776	91.1111	92.9962	1.6337	0.05
C10-CS NP	100 mg/mL	0.1% Acetic acid	0.025	34	35	37	79.0698	76.087	82.2222	20.9302	23.913	17.7778	20.8737	3.06802		C10-CS NP	100 mg/mL	0.1% Acetic acid	0.025	4	5	4	8	10.2041	8.88889	92	89.7959	91.1111	90.969	1.10889
C10-CS NP	100 mg/mL	0.1% Acetic acid	0.0125	45	46	40	104.651	100	88.8889	-4.65116	0	11.1111	2.15332	8.09876		C10-CS NP	100 mg/mL	0.1% Acetic acid	0.0125	4	3	3	8	6.12245	6.66667	92	93.8776	93.3333	93.0703	0.966018
C10-CS NP	100 mg/mL	0.1% Acetic acid	0.00625	50	52	49	116.279	113.043	108.889	-16.2791	-13.0435	-8.88889	-12.7371	3.7046		C10-CS NP	100 mg/mL	0.1% Acetic acid	0.00625	40	38	41	80	77.551	91.1111	20	22.449	8.88889	17.1126	7.22646
C11-CS NP	100 mg/mL	0.1% Acetic acid	0.05	22	23	20	51.1628	50	44.4444	48.8372	50	55.5556	51.4643	3.59055	>5%	C11-CS NP	100 mg/mL	0.1% Acetic acid	0.05	34	35	36	68	71.4286	80	32	28.5714	20	26.8571	6.18095	>5%
C11-CS NP	100 mg/mL	0.1% Acetic acid	0.025	30	38	35	69.7674	82.6087	77.7778	30.2326	17.3913	22.2222	23.282	6.4859		C11-CS NP	100 mg/mL	0.1% Acetic acid	0.025	34	34	35	68	69.3878	77.7778	32	30.6122	22.2222	28.2782	5.29029
C11-CS NP	100 mg/mL	0.1% Acetic acid	0.0125	35	36	39	81.3953	78.2609	86.6667	18.6047	21.7391	13.3333	17.8924	4.24792		C11-CS NP	100 mg/mL	0.1% Acetic acid	0.0125	41	40	43	82	81.6327	95.5556	18	18.3673	4.44444	13.6039	7.93447
C11-CS NP	100 mg/mL	0.1% Acetic acid	0.00625	50	45	49	116.279	97.8261	108.889	-16.2791	2.17391	-8.88889	-7.66468	9.2872		C11-CS NP	100 mg/mL	0.1% Acetic acid	0.00625	44	46	44	88	93.8776	97.7778	12	6.12245	2.22222	6.78156	4.9221

## Sheet: Propolis combination-CS NP-AC5
Propolis ethanolic extracts (Propolis combination CS NP)	Stock conc.	Solubility	Final conc.	Number of Acanthamoeba cells			Acanthamoeba viability (%)			Acanthamoeba inhibition (%)					MITC (%) Trop AC5	Propolis ethanolic extracts (Propolis combination CS NP)	Stock conc.	Solubility	Final conc.	Number of Acanthamoeba cells			Acanthamoeba viability (%)			Acanthamoeba inhibition (%)					MICC (%) Cyst AC5
				Trophozoite form			Trophozoite form			Trophozoite form										Cyst form			Cyst form			Cyst form
				A. castellanii ATCC50739			A. castellanii ATCC50739			A. castellanii ATCC50739										A. castellanii ATCC50739			A. castellanii ATCC50739			A. castellanii ATCC50739
				1	2	3	1	2	3	1	2	3	Mean	SD						1	2	3	1	2	3	1	2	3	Mean	SD
Untreated Acanthamoeba	N/A	N/A	N/A													Untreated Acanthamoeba	N/A	N/A	N/A
0.05% Acetic acid (Neg. conrol)	0.001	DI	0.0005	60	58	55										0.05% Acetic acid (Neg. conrol)	0.001	DI	0.0005	25	28	29
CHX 8 µg/mL (Pos. control)	32 mg/mL	N/A	8 µg/mL	0	0	0	0	0	0	100	100	100	100	0		CHX 8 µg/mL (Pos. control)	32 mg/mL	N/A	128 µg/mL	0	0	0	0	0	0	100	100	100	100	0
C1-CS NP	100 mg/mL	0.1% Acetic acid	0.05	5	5	3	8.33333	8.62069	5.45455	91.6667	91.3793	94.5455	92.5305	1.75093	0.05	C1-CS NP	100 mg/mL	0.1% Acetic acid	0.05	3	5	5	12	17.8571	17.2414	88	82.1429	82.7586	84.3005	3.21863	>5%
C1-CS NP	100 mg/mL	0.1% Acetic acid	0.025	15	15	16	25	25.8621	29.0909	75	74.1379	70.9091	73.349	2.15654		C1-CS NP	100 mg/mL	0.1% Acetic acid	0.025	5	7	5	20	25	17.2414	80	75	82.7586	79.2529	3.9329
C1-CS NP	100 mg/mL	0.1% Acetic acid	0.0125	33	33	35	55	56.8966	63.6364	45	43.1034	36.3636	41.489	4.53888		C1-CS NP	100 mg/mL	0.1% Acetic acid	0.0125	8	8	6	32	28.5714	20.6897	68	71.4286	79.3103	72.913	5.79944
C1-CS NP	100 mg/mL	0.1% Acetic acid	0.00625	55	50	60	91.6667	86.2069	109.091	8.33333	13.7931	-9.09091	4.34518	11.9519		C1-CS NP	100 mg/mL	0.1% Acetic acid	0.00625	8	10	8	32	35.7143	27.5862	68	64.2857	72.4138	68.2332	4.06905
C2-CS NP	100 mg/mL	0.1% Acetic acid	0.05	8	8	7	13.3333	13.7931	12.7273	86.6667	86.2069	87.2727	86.7154	0.534586	>5%	C2-CS NP	100 mg/mL	0.1% Acetic acid	0.05	2	3	4	8	10.7143	13.7931	92	89.2857	86.2069	89.1642	2.89846	0.05
C2-CS NP	100 mg/mL	0.1% Acetic acid	0.025	23	25	29	38.3333	43.1034	52.7273	61.6667	56.8966	47.2727	55.2786	7.33209		C2-CS NP	100 mg/mL	0.1% Acetic acid	0.025	7	7	9	28	25	31.0345	72	75	68.9655	71.9885	3.01726
C2-CS NP	100 mg/mL	0.1% Acetic acid	0.0125	52	55	50	86.6667	94.8276	90.9091	13.3333	5.17241	9.09091	9.19889	4.08153		C2-CS NP	100 mg/mL	0.1% Acetic acid	0.0125	7	9	9	28	32.1429	31.0345	72	67.8571	68.9655	69.6076	2.14476
C2-CS NP	100 mg/mL	0.1% Acetic acid	0.00625	60	57	55	100	98.2759	100	0	1.72414	0	0.574713	0.995431		C2-CS NP	100 mg/mL	0.1% Acetic acid	0.00625	7	9	10	28	32.1429	34.4828	72	67.8571	65.5172	68.4581	3.2829
C3-CS NP	100 mg/mL	0.1% Acetic acid	0.05	32	33	33	53.3333	56.8966	60	46.6667	43.1034	40	43.2567	3.33597	>5%	C3-CS NP	100 mg/mL	0.1% Acetic acid	0.05	7	9	9	28	32.1429	31.0345	72	67.8571	68.9655	69.6076	2.14476	>5%
C3-CS NP	100 mg/mL	0.1% Acetic acid	0.025	31	36	32	51.6667	62.069	58.1818	48.3333	37.931	41.8182	42.6942	5.25619		C3-CS NP	100 mg/mL	0.1% Acetic acid	0.025	8	9	9	32	32.1429	31.0345	68	67.8571	68.9655	68.2742	0.602927
C3-CS NP	100 mg/mL	0.1% Acetic acid	0.0125	60	58	54	100	100	98.1818	0	0	1.81818	0.606061	1.04973		C3-CS NP	100 mg/mL	0.1% Acetic acid	0.0125	8	9	10	32	32.1429	34.4828	68	67.8571	65.5172	67.1248	1.39401
C3-CS NP	100 mg/mL	0.1% Acetic acid	0.00625	58	56	57	96.6667	96.5517	103.636	3.33333	3.44828	-3.63636	1.04842	4.05754		C3-CS NP	100 mg/mL	0.1% Acetic acid	0.00625	16	17	16	64	60.7143	55.1724	36	39.2857	44.8276	40.0378	4.46159
C4-CS NP	100 mg/mL	0.1% Acetic acid	0.05	35	36	33	58.3333	62.069	60	41.6667	37.931	40	39.8659	1.87142	>5%	C4-CS NP	100 mg/mL	0.1% Acetic acid	0.05	5	5	6	20	17.8571	20.6897	80	82.1429	79.3103	80.4844	1.47708	>5%
C4-CS NP	100 mg/mL	0.1% Acetic acid	0.025	42	43	40	70	74.1379	72.7273	30	25.8621	27.2727	27.7116	2.10359		C4-CS NP	100 mg/mL	0.1% Acetic acid	0.025	7	7	10	28	25	34.4828	72	75	65.5172	70.8391	4.8468
C4-CS NP	100 mg/mL	0.1% Acetic acid	0.0125	50	48	45	83.3333	82.7586	81.8182	16.6667	17.2414	18.1818	17.3633	0.764897		C4-CS NP	100 mg/mL	0.1% Acetic acid	0.0125	9	9	7	36	32.1429	24.1379	64	67.8571	75.8621	69.2397	6.05069
C4-CS NP	100 mg/mL	0.1% Acetic acid	0.00625	60	56	56	100	96.5517	101.818	0	3.44828	-1.81818	0.543365	2.67494		C4-CS NP	100 mg/mL	0.1% Acetic acid	0.00625	15	17	17	60	60.7143	58.6207	40	39.2857	41.3793	40.2217	1.06426
C5-CS NP	100 mg/mL	0.1% Acetic acid	0.05	5	5	4	8.33333	8.62069	7.27273	91.6667	91.3793	92.7273	91.9244	0.709984	0.05	C5-CS NP	100 mg/mL	0.1% Acetic acid	0.05	10	9	13	40	32.1429	44.8276	60	67.8571	55.1724	61.0099	6.40238	>5%
C5-CS NP	100 mg/mL	0.1% Acetic acid	0.025	20	20	21	33.3333	34.4828	38.1818	66.6667	65.5172	61.8182	64.6674	2.53351		C5-CS NP	100 mg/mL	0.1% Acetic acid	0.025	11	11	10	44	39.2857	34.4828	56	60.7143	65.5172	60.7438	4.75869
C5-CS NP	100 mg/mL	0.1% Acetic acid	0.0125	40	43	40	66.6667	74.1379	72.7273	33.3333	25.8621	27.2727	28.8227	3.96948		C5-CS NP	100 mg/mL	0.1% Acetic acid	0.0125	14	16	15	56	57.1429	51.7241	44	42.8571	48.2759	45.0443	2.85633
C5-CS NP	100 mg/mL	0.1% Acetic acid	0.00625	53	55	55	88.3333	94.8276	100	11.6667	5.17241	0	5.61303	5.8458		C5-CS NP	100 mg/mL	0.1% Acetic acid	0.00625	13	15	17	52	53.5714	58.6207	48	46.4286	41.3793	45.2693	3.45924
C6-CS NP	100 mg/mL	0.1% Acetic acid	0.05	40	41	39	66.6667	70.6897	70.9091	33.3333	29.3103	29.0909	30.5782	2.38854	>5%	C6-CS NP	100 mg/mL	0.1% Acetic acid	0.05	6	6	8	24	21.4286	27.5862	76	78.5714	72.4138	75.6617	3.09272	>5%
C6-CS NP	100 mg/mL	0.1% Acetic acid	0.025	48	42	45	80	72.4138	81.8182	20	27.5862	18.1818	21.9227	4.9883		C6-CS NP	100 mg/mL	0.1% Acetic acid	0.025	8	8	8	32	28.5714	27.5862	68	71.4286	72.4138	70.6141	2.31687
C6-CS NP	100 mg/mL	0.1% Acetic acid	0.0125	30	32	31	50	55.1724	56.3636	50	44.8276	43.6364	46.1546	3.38302		C6-CS NP	100 mg/mL	0.1% Acetic acid	0.0125	8	9	9	32	32.1429	31.0345	68	67.8571	68.9655	68.2742	0.602927
C6-CS NP	100 mg/mL	0.1% Acetic acid	0.00625	51	52	53	85	89.6552	96.3636	15	10.3448	3.63636	9.6604	5.71265		C6-CS NP	100 mg/mL	0.1% Acetic acid	0.00625	16	18	16	64	64.2857	55.1724	36	35.7143	44.8276	38.8473	5.18106
C7-CS NP	100 mg/mL	0.1% Acetic acid	0.05	24	26	20	40	44.8276	36.3636	60	55.1724	63.6364	59.6029	4.24592	>5%	C7-CS NP	100 mg/mL	0.1% Acetic acid	0.05	6	7	6	24	25	20.6897	76	75	79.3103	76.7701	2.25601	>5%
C7-CS NP	100 mg/mL	0.1% Acetic acid	0.025	43	48	45	71.6667	82.7586	81.8182	28.3333	17.2414	18.1818	21.2522	6.15046		C7-CS NP	100 mg/mL	0.1% Acetic acid	0.025	10	12	12	40	42.8571	41.3793	60	57.1429	58.6207	58.5878	1.42885
C7-CS NP	100 mg/mL	0.1% Acetic acid	0.0125	40	38	35	66.6667	65.5172	63.6364	33.3333	34.4828	36.3636	34.7266	1.52979		C7-CS NP	100 mg/mL	0.1% Acetic acid	0.0125	17	17	15	68	60.7143	51.7241	32	39.2857	48.2759	39.8539	8.15279
C7-CS NP	100 mg/mL	0.1% Acetic acid	0.00625	58	54	55	96.6667	93.1034	100	3.33333	6.89655	0	3.40996	3.44891		C7-CS NP	100 mg/mL	0.1% Acetic acid	0.00625	18	18	18	72	64.2857	62.069	28	35.7143	37.931	33.8818	5.21296
C8-CS NP	100 mg/mL	0.1% Acetic acid	0.05	35	33	37	58.3333	56.8966	67.2727	41.6667	43.1034	32.7273	39.1658	5.62201	>5%	C8-CS NP	100 mg/mL	0.1% Acetic acid	0.05	7	7	7	28	25	24.1379	72	75	75.8621	74.2874	2.02726	>5%
C8-CS NP	100 mg/mL	0.1% Acetic acid	0.025	50	48	45	83.3333	82.7586	81.8182	16.6667	17.2414	18.1818	17.3633	0.764897		C8-CS NP	100 mg/mL	0.1% Acetic acid	0.025	6	6	5	24	21.4286	17.2414	76	78.5714	82.7586	79.11	3.41135
C8-CS NP	100 mg/mL	0.1% Acetic acid	0.0125	55	51	51	91.6667	87.931	92.7273	8.33333	12.069	7.27273	9.22501	2.51938		C8-CS NP	100 mg/mL	0.1% Acetic acid	0.0125	12	13	15	48	46.4286	51.7241	52	53.5714	48.2759	51.2824	2.71973
C8-CS NP	100 mg/mL	0.1% Acetic acid	0.00625	63	58	59	105	100	107.273	-5	0	-7.27273	-4.09091	3.72061		C8-CS NP	100 mg/mL	0.1% Acetic acid	0.00625	17	18	19	68	64.2857	65.5172	32	35.7143	34.4828	34.0657	1.89194
C9-CS NP	100 mg/mL	0.1% Acetic acid	0.05	51	48	49	85	82.7586	89.0909	15	17.2414	10.9091	14.3835	3.21085	>5%	C9-CS NP	100 mg/mL	0.1% Acetic acid	0.05	5	5	3	20	17.8571	10.3448	80	82.1429	89.6552	83.9327	5.07032	>5%
C9-CS NP	100 mg/mL	0.1% Acetic acid	0.025	52	51	49	86.6667	87.931	89.0909	13.3333	12.069	10.9091	12.1038	1.2125		C9-CS NP	100 mg/mL	0.1% Acetic acid	0.025	5	4	4	20	14.2857	13.7931	80	85.7143	86.2069	83.9737	3.45015
C9-CS NP	100 mg/mL	0.1% Acetic acid	0.0125	50	49	48	83.3333	84.4828	87.2727	16.6667	15.5172	12.7273	14.9704	2.02583		C9-CS NP	100 mg/mL	0.1% Acetic acid	0.0125	4	5	5	16	17.8571	17.2414	84	82.1429	82.7586	82.9672	0.945971
C9-CS NP	100 mg/mL	0.1% Acetic acid	0.00625	54	55	51	90	94.8276	92.7273	10	5.17241	7.27273	7.48171	2.42057		C9-CS NP	100 mg/mL	0.1% Acetic acid	0.00625	5	5	6	20	17.8571	20.6897	80	82.1429	79.3103	80.4844	1.47708
C10-CS NP	100 mg/mL	0.1% Acetic acid	0.05	23	20	25	38.3333	34.4828	45.4545	61.6667	65.5172	54.5455	60.5765	5.56655	>5%	C10-CS NP	100 mg/mL	0.1% Acetic acid	0.05	4	4	6	16	14.2857	20.6897	84	85.7143	79.3103	83.0082	3.31517	>5%
C10-CS NP	100 mg/mL	0.1% Acetic acid	0.025	40	44	43	66.6667	75.8621	78.1818	33.3333	24.1379	21.8182	26.4298	6.09009		C10-CS NP	100 mg/mL	0.1% Acetic acid	0.025	10	10	11	40	35.7143	37.931	60	64.2857	62.069	62.1182	2.14328
C10-CS NP	100 mg/mL	0.1% Acetic acid	0.0125	50	48	51	83.3333	82.7586	92.7273	16.6667	17.2414	7.27273	13.7269	5.59688		C10-CS NP	100 mg/mL	0.1% Acetic acid	0.0125	10	14	15	40	50	51.7241	60	50	48.2759	52.7586	6.33019
C10-CS NP	100 mg/mL	0.1% Acetic acid	0.00625	52	54	52	86.6667	93.1034	94.5455	13.3333	6.89655	5.45455	8.56148	4.19497		C10-CS NP	100 mg/mL	0.1% Acetic acid	0.00625	10	12	16	40	42.8571	55.1724	60	57.1429	44.8276	53.9901	8.06258
C11-CS NP	100 mg/mL	0.1% Acetic acid	0.05	25	24	22	41.6667	41.3793	40	58.3333	58.6207	60	58.9847	0.890959	>5%	C11-CS NP	100 mg/mL	0.1% Acetic acid	0.05	7	7	7	28	25	24.1379	72	75	75.8621	74.2874	2.02726	>5%
C11-CS NP	100 mg/mL	0.1% Acetic acid	0.025	30	31	35	50	53.4483	63.6364	50	46.5517	36.3636	44.3051	7.09035		C11-CS NP	100 mg/mL	0.1% Acetic acid	0.025	8	8	9	32	28.5714	31.0345	68	71.4286	68.9655	69.4647	1.76795
C11-CS NP	100 mg/mL	0.1% Acetic acid	0.0125	40	43	45	66.6667	74.1379	81.8182	33.3333	25.8621	18.1818	25.7924	7.576		C11-CS NP	100 mg/mL	0.1% Acetic acid	0.0125	8	9	10	32	32.1429	34.4828	68	67.8571	65.5172	67.1248	1.39401
C11-CS NP	100 mg/mL	0.1% Acetic acid	0.00625	60	59	57	100	101.724	103.636	0	-1.72414	-3.63636	-1.78683	1.81899		C11-CS NP	100 mg/mL	0.1% Acetic acid	0.00625	12	14	12	48	50	41.3793	52	50	58.6207	53.5402	4.51202

## Sheet: Propolis combination-CS NP-AP
Propolis ethanolic extracts (Propolis combination CS NP)	Stock conc.	Solubility	Final conc.	Number of Acanthamoeba cells			Acanthamoeba viability (%)			Acanthamoeba inhibition (%)					MITC (%) Trop AP	Propolis ethanolic extracts (Propolis combination CS NP)	Stock conc.	Solubility	Final conc.	Number of Acanthamoeba cells			Acanthamoeba viability (%)			Acanthamoeba inhibition (%)					MICC (%) Cyst AP
				Trophozoite form			Trophozoite form			Trophozoite form										Cyst form			Cyst form			Cyst form
				A. polyphaga ATCC30461			A. polyphaga ATCC30461			A. polyphaga ATCC30461										A. polyphaga ATCC30461			A. polyphaga ATCC30461			A. polyphaga ATCC30461
				1	2	3	1	2	3	1	2	3	Mean	SD						1	2	3	1	2	3	1	2	3	Mean	SD
Untreated Acanthamoeba	N/A	N/A	N/A													Untreated Acanthamoeba	N/A	N/A	N/A
0.05% Acetic acid (Neg. conrol)	0.001	DI	0.0005	50	50	55										0.05% Acetic acid (Neg. conrol)	0.001	DI	0.0005	25	28	30
CHX 8 µg/mL (Pos. control)	32 mg/mL	N/A	8 µg/mL	0	0	0	0	0	0	100	100	100	100	0		CHX 8 µg/mL (Pos. control)	32 mg/mL	N/A	128 µg/mL	0	0	0	0	0	0	100	100	100	100	0
C1-CS NP	100 mg/mL	0.1% Acetic acid	0.05	7	7	8	14	14	14.5455	86	86	85.4545	85.8182	0.314918	>5%	C1-CS NP	100 mg/mL	0.1% Acetic acid	0.05	3	3	2	12	10.7143	6.66667	88	89.2857	93.3333	90.2063	2.78331	0.05
C1-CS NP	100 mg/mL	0.1% Acetic acid	0.025	8	7	10	16	14	18.1818	84	86	81.8182	83.9394	2.09157		C1-CS NP	100 mg/mL	0.1% Acetic acid	0.025	5	5	6	20	17.8571	20	80	82.1429	80	80.7143	1.23718
C1-CS NP	100 mg/mL	0.1% Acetic acid	0.0125	13	13	12	26	26	21.8182	74	74	78.1818	75.3939	2.41437		C1-CS NP	100 mg/mL	0.1% Acetic acid	0.0125	11	11	13	44	39.2857	43.3333	56	60.7143	56.6667	57.7937	2.55121
C1-CS NP	100 mg/mL	0.1% Acetic acid	0.00625	28	28	30	56	56	54.5455	44	44	45.4545	44.4848	0.839782		C1-CS NP	100 mg/mL	0.1% Acetic acid	0.00625	12	15	14	48	53.5714	46.6667	52	46.4286	53.3333	50.5873	3.66275
C2-CS NP	100 mg/mL	0.1% Acetic acid	0.05	12	11	13	24	22	23.6364	76	78	76.3636	76.7879	1.06536	>5%	C2-CS NP	100 mg/mL	0.1% Acetic acid	0.05	5	5	4	20	17.8571	13.3333	80	82.1429	86.6667	82.9365	3.40346	>5%
C2-CS NP	100 mg/mL	0.1% Acetic acid	0.025	23	22	27	46	44	49.0909	54	56	50.9091	53.6364	2.56486		C2-CS NP	100 mg/mL	0.1% Acetic acid	0.025	9	11	10	36	39.2857	33.3333	64	60.7143	66.6667	63.7937	2.98155
C2-CS NP	100 mg/mL	0.1% Acetic acid	0.0125	40	41	38	80	82	69.0909	20	18	30.9091	22.9697	6.94806		C2-CS NP	100 mg/mL	0.1% Acetic acid	0.0125	9	11	12	36	39.2857	40	64	60.7143	60	61.5714	2.13331
C2-CS NP	100 mg/mL	0.1% Acetic acid	0.00625	35	33	35	70	66	63.6364	30	34	36.3636	33.4545	3.21669		C2-CS NP	100 mg/mL	0.1% Acetic acid	0.00625	10	12	11	40	42.8571	36.6667	60	57.1429	63.3333	60.1587	3.09829
C3-CS NP	100 mg/mL	0.1% Acetic acid	0.05	15	11	14	30	22	25.4545	70	78	74.5455	74.1818	4.01238	>5%	C3-CS NP	100 mg/mL	0.1% Acetic acid	0.05	12	12	13	48	42.8571	43.3333	52	57.1429	56.6667	55.2698	2.84176	>5%
C3-CS NP	100 mg/mL	0.1% Acetic acid	0.025	29	28	28	58	56	50.9091	42	44	49.0909	45.0303	3.65601		C3-CS NP	100 mg/mL	0.1% Acetic acid	0.025	10	11	11	40	39.2857	36.6667	60	60.7143	63.3333	61.3492	1.75503
C3-CS NP	100 mg/mL	0.1% Acetic acid	0.0125	32	33	30	64	66	54.5455	36	34	45.4545	38.4848	6.11821		C3-CS NP	100 mg/mL	0.1% Acetic acid	0.0125	10	11	12	40	39.2857	40	60	60.7143	60	60.2381	0.412393
C3-CS NP	100 mg/mL	0.1% Acetic acid	0.00625	36	38	35	72	76	63.6364	28	24	36.3636	29.4545	6.30886		C3-CS NP	100 mg/mL	0.1% Acetic acid	0.00625	10	11	14	40	39.2857	46.6667	60	60.7143	53.3333	58.0159	4.07089
C4-CS NP	100 mg/mL	0.1% Acetic acid	0.05	14	14	13	28	28	23.6364	72	72	76.3636	73.4545	2.51935	>5%	C4-CS NP	100 mg/mL	0.1% Acetic acid	0.05	5	4	5	20	14.2857	16.6667	80	85.7143	83.3333	83.0159	2.87034	>5%
C4-CS NP	100 mg/mL	0.1% Acetic acid	0.025	21	23	20	42	46	36.3636	58	54	63.6364	58.5455	4.84128		C4-CS NP	100 mg/mL	0.1% Acetic acid	0.025	6	6	5	24	21.4286	16.6667	76	78.5714	83.3333	79.3016	3.72079
C4-CS NP	100 mg/mL	0.1% Acetic acid	0.0125	47	48	50	94	96	90.9091	6	4	9.09091	6.36364	2.56486		C4-CS NP	100 mg/mL	0.1% Acetic acid	0.0125	7	7	6	28	25	20	72	75	80	75.6667	4.04145
C4-CS NP	100 mg/mL	0.1% Acetic acid	0.00625	47	47	50	94	94	90.9091	6	6	9.09091	7.0303	1.78454		C4-CS NP	100 mg/mL	0.1% Acetic acid	0.00625	17	15	16	68	53.5714	53.3333	32	46.4286	46.6667	41.6984	8.39992
C5-CS NP	100 mg/mL	0.1% Acetic acid	0.05	17	16	18	34	32	32.7273	66	68	67.2727	67.0909	1.01232	>5%	C5-CS NP	100 mg/mL	0.1% Acetic acid	0.05	5	4	5	20	14.2857	16.6667	80	85.7143	83.3333	83.0159	2.87034	>5%
C5-CS NP	100 mg/mL	0.1% Acetic acid	0.025	35	33	35	70	66	63.6364	30	34	36.3636	33.4545	3.21669		C5-CS NP	100 mg/mL	0.1% Acetic acid	0.025	5	4	5	20	14.2857	16.6667	80	85.7143	83.3333	83.0159	2.87034
C5-CS NP	100 mg/mL	0.1% Acetic acid	0.0125	35	34	33	70	68	60	30	32	40	34	5.2915		C5-CS NP	100 mg/mL	0.1% Acetic acid	0.0125	6	7	6	24	25	20	76	75	80	77	2.64575
C5-CS NP	100 mg/mL	0.1% Acetic acid	0.00625	33	35	35	66	70	63.6364	34	30	36.3636	33.4545	3.21669		C5-CS NP	100 mg/mL	0.1% Acetic acid	0.00625	7	8	7	28	28.5714	23.3333	72	71.4286	76.6667	73.3651	2.8735
C6-CS NP	100 mg/mL	0.1% Acetic acid	0.05	14	11	12	28	22	21.8182	72	78	78.1818	76.0606	3.51776	>5%	C6-CS NP	100 mg/mL	0.1% Acetic acid	0.05	4	3	3	16	10.7143	10	84	89.2857	90	87.7619	3.27742	0.05
C6-CS NP	100 mg/mL	0.1% Acetic acid	0.025	34	32	36	68	64	65.4545	32	36	34.5455	34.1818	2.02464		C6-CS NP	100 mg/mL	0.1% Acetic acid	0.025	9	9	10	36	32.1429	33.3333	64	67.8571	66.6667	66.1746	1.97509
C6-CS NP	100 mg/mL	0.1% Acetic acid	0.0125	38	38	40	76	76	72.7273	24	24	27.2727	25.0909	1.88951		C6-CS NP	100 mg/mL	0.1% Acetic acid	0.0125	8	10	9	32	35.7143	30	68	64.2857	70	67.4286	2.89968
C6-CS NP	100 mg/mL	0.1% Acetic acid	0.00625	38	38	38	76	76	69.0909	24	24	30.9091	26.303	3.98897		C6-CS NP	100 mg/mL	0.1% Acetic acid	0.00625	9	10	11	36	35.7143	36.6667	64	64.2857	63.3333	63.873	0.488724
C7-CS NP	100 mg/mL	0.1% Acetic acid	0.05	31	31	29	62	62	52.7273	38	38	47.2727	41.0909	5.35361	>5%	C7-CS NP	100 mg/mL	0.1% Acetic acid	0.05	3	3	2	12	10.7143	6.66667	88	89.2857	93.3333	90.2063	2.78331	0.05
C7-CS NP	100 mg/mL	0.1% Acetic acid	0.025	31	39	31	62	78	56.3636	38	22	43.6364	34.5455	11.2242		C7-CS NP	100 mg/mL	0.1% Acetic acid	0.025	7	7	7	28	25	23.3333	72	75	76.6667	74.5556	2.36487
C7-CS NP	100 mg/mL	0.1% Acetic acid	0.0125	39	40	46	78	80	83.6364	22	20	16.3636	19.4545	2.8575		C7-CS NP	100 mg/mL	0.1% Acetic acid	0.0125	6	6	8	24	21.4286	26.6667	76	78.5714	73.3333	75.9683	2.61919
C7-CS NP	100 mg/mL	0.1% Acetic acid	0.00625	50	50	50	100	100	90.9091	0	0	9.09091	3.0303	5.24864		C7-CS NP	100 mg/mL	0.1% Acetic acid	0.00625	10	12	10	40	42.8571	33.3333	60	57.1429	66.6667	61.2698	4.88724
C8-CS NP	100 mg/mL	0.1% Acetic acid	0.05	18	16	19	36	32	34.5455	64	68	65.4545	65.8182	2.02464	>5%	C8-CS NP	100 mg/mL	0.1% Acetic acid	0.05	3	3	2	12	10.7143	6.66667	88	89.2857	93.3333	90.2063	2.78331	0.05
C8-CS NP	100 mg/mL	0.1% Acetic acid	0.025	25	22	24	50	44	43.6364	50	56	56.3636	54.1212	3.5737		C8-CS NP	100 mg/mL	0.1% Acetic acid	0.025	5	5	6	20	17.8571	20	80	82.1429	80	80.7143	1.23718
C8-CS NP	100 mg/mL	0.1% Acetic acid	0.0125	45	45	41	90	90	74.5455	10	10	25.4545	15.1515	8.92269		C8-CS NP	100 mg/mL	0.1% Acetic acid	0.0125	7	7	8	28	25	26.6667	72	75	73.3333	73.4444	1.50308
C8-CS NP	100 mg/mL	0.1% Acetic acid	0.00625	49	46	46	98	92	83.6364	2	8	16.3636	8.78788	7.21416		C8-CS NP	100 mg/mL	0.1% Acetic acid	0.00625	12	13	15	48	46.4286	50	52	53.5714	50	51.8571	1.78999
C9-CS NP	100 mg/mL	0.1% Acetic acid	0.05	30	28	31	60	56	56.3636	40	44	43.6364	42.5455	2.21191	>5%	C9-CS NP	100 mg/mL	0.1% Acetic acid	0.05	7	7	8	28	25	26.6667	72	75	73.3333	73.4444	1.50308	>5%
C9-CS NP	100 mg/mL	0.1% Acetic acid	0.025	37	35	38	74	70	69.0909	26	30	30.9091	28.9697	2.61169		C9-CS NP	100 mg/mL	0.1% Acetic acid	0.025	7	7	9	28	25	30	72	75	70	72.3333	2.51661
C9-CS NP	100 mg/mL	0.1% Acetic acid	0.0125	43	44	47	86	88	85.4545	14	12	14.5455	13.5152	1.3402		C9-CS NP	100 mg/mL	0.1% Acetic acid	0.0125	13	13	15	52	46.4286	50	48	53.5714	50	50.5238	2.82241
C9-CS NP	100 mg/mL	0.1% Acetic acid	0.00625	44	43	45	88	86	81.8182	12	14	18.1818	14.7273	3.15443		C9-CS NP	100 mg/mL	0.1% Acetic acid	0.00625	12	13	14	48	46.4286	46.6667	52	53.5714	53.3333	52.9683	0.846941
C10-CS NP	100 mg/mL	0.1% Acetic acid	0.05	14	14	16	28	28	29.0909	72	72	70.9091	71.6364	0.629837	>5%	C10-CS NP	100 mg/mL	0.1% Acetic acid	0.05	5	5	4	20	17.8571	13.3333	80	82.1429	86.6667	82.9365	3.40346	>5%
C10-CS NP	100 mg/mL	0.1% Acetic acid	0.025	28	28	31	56	56	56.3636	44	44	43.6364	43.8788	0.209946		C10-CS NP	100 mg/mL	0.1% Acetic acid	0.025	7	6	5	28	21.4286	16.6667	72	78.5714	83.3333	77.9683	5.69069
C10-CS NP	100 mg/mL	0.1% Acetic acid	0.0125	28	30	33	56	60	60	44	40	40	41.3333	2.3094		C10-CS NP	100 mg/mL	0.1% Acetic acid	0.0125	6	7	7	24	25	23.3333	76	75	76.6667	75.8889	0.83887
C10-CS NP	100 mg/mL	0.1% Acetic acid	0.00625	48	47	51	96	94	92.7273	4	6	7.27273	5.75758	1.64978		C10-CS NP	100 mg/mL	0.1% Acetic acid	0.00625	8	7	8	32	25	26.6667	68	75	73.3333	72.1111	3.65655
C11-CS NP	100 mg/mL	0.1% Acetic acid	0.05	19	19	21	38	38	38.1818	62	62	61.8182	61.9394	0.104973	>5%	C11-CS NP	100 mg/mL	0.1% Acetic acid	0.05	2	2	3	8	7.14286	10	92	92.8571	90	91.619	1.46617	0.0125
C11-CS NP	100 mg/mL	0.1% Acetic acid	0.025	25	23	28	50	46	50.9091	50	54	49.0909	51.0303	2.61169		C11-CS NP	100 mg/mL	0.1% Acetic acid	0.025	2	3	3	8	10.7143	10	92	89.2857	90	90.4286	1.40698
C11-CS NP	100 mg/mL	0.1% Acetic acid	0.0125	49	50	54	98	100	98.1818	2	0	1.81818	1.27273	1.10596		C11-CS NP	100 mg/mL	0.1% Acetic acid	0.0125	3	3	3	12	10.7143	10	88	89.2857	90	89.0952	1.01351
C11-CS NP	100 mg/mL	0.1% Acetic acid	0.00625	50	50	55	100	100	100	0	0	0	0	0		C11-CS NP	100 mg/mL	0.1% Acetic acid	0.00625	5	6	5	20	21.4286	16.6667	80	78.5714	83.3333	80.6349	2.44362

## Sheet: Propolis combination-CS NP-AT
Propolis ethanolic extracts (Propolis combination CS NP)	Stock conc.	Solubility	Final conc.	Number of Acanthamoeba cells			Acanthamoeba viability (%)			Acanthamoeba inhibition (%)					MITC (%) Trop AT	Propolis ethanolic extracts (Propolis combination CS NP)	Stock conc.	Solubility	Final conc.	Number of Acanthamoeba cells			Acanthamoeba viability (%)			Acanthamoeba inhibition (%)					MICC (%) Cyst AT
				Trophozoite form			Trophozoite form			Trophozoite form										Cyst form			Cyst form			Cyst form
				A. triangularis WU19001			A. triangularis WU19001			A. triangularis WU19001										A. triangularis WU19001			A. triangularis WU19001			A. triangularis WU19001
				1	2	3	1	2	3	1	2	3	Mean	SD						1	2	3	1	2	3	1	2	3	Mean	SD
Untreated Acanthamoeba	N/A	N/A	N/A													Untreated Acanthamoeba	N/A	N/A	N/A
0.05% Acetic acid (Neg. conrol)	0.001	DI	0.0005	55	59	58										0.05% Acetic acid (Neg. conrol)	0.001	DI	0.0005	45	48	49
CHX 8 µg/mL (Pos. control)	32 mg/mL	N/A	8 µg/mL	0	0	0	0	0	0	100	100	100	100	0		CHX 8 µg/mL (Pos. control)	32 mg/mL	N/A	128 µg/mL	0	0	0	0	0	0	100	100	100	100	0
C1-CS NP	100 mg/mL	0.1% Acetic acid	0.05	3	3	4	5.45455	5.08475	6.89655	94.5455	94.9153	93.1034	94.1881	0.95732	0.05	C1-CS NP	100 mg/mL	0.1% Acetic acid	0.05	12	12	15	26.6667	25	30.6122	73.3333	75	69.3878	72.5737	2.88221	>5%
C1-CS NP	100 mg/mL	0.1% Acetic acid	0.025	38	36	35	69.0909	61.0169	60.3448	30.9091	38.9831	39.6552	36.5158	4.86714		C1-CS NP	100 mg/mL	0.1% Acetic acid	0.025	30	33	31	66.6667	68.75	63.2653	33.3333	31.25	36.7347	33.7727	2.76862
C1-CS NP	100 mg/mL	0.1% Acetic acid	0.0125	39	38	41	70.9091	64.4068	70.6897	29.0909	35.5932	29.3103	31.3315	3.6924		C1-CS NP	100 mg/mL	0.1% Acetic acid	0.0125	30	33	35	66.6667	68.75	71.4286	33.3333	31.25	28.5714	31.0516	2.38714
C1-CS NP	100 mg/mL	0.1% Acetic acid	0.00625	50	55	55	90.9091	93.2203	94.8276	9.09091	6.77966	5.17241	7.01433	1.96976		C1-CS NP	100 mg/mL	0.1% Acetic acid	0.00625	32	33	34	71.1111	68.75	69.3878	28.8889	31.25	30.6122	30.2504	1.22144
C2-CS NP	100 mg/mL	0.1% Acetic acid	0.05	40	40	39	72.7273	67.7966	67.2414	27.2727	32.2034	32.7586	30.7449	3.01979	>5%	C2-CS NP	100 mg/mL	0.1% Acetic acid	0.05	19	19	16	42.2222	39.5833	32.6531	57.7778	60.4167	67.3469	61.8471	4.94236	>5%
C2-CS NP	100 mg/mL	0.1% Acetic acid	0.025	50	49	51	90.9091	83.0508	87.931	9.09091	16.9492	12.069	12.703	3.9673		C2-CS NP	100 mg/mL	0.1% Acetic acid	0.025	22	20	19	48.8889	41.6667	38.7755	51.1111	58.3333	61.2245	56.8896	5.20896
C2-CS NP	100 mg/mL	0.1% Acetic acid	0.0125	52	51	53	94.5455	86.4407	91.3793	5.45455	13.5593	8.62069	9.21152	4.08456		C2-CS NP	100 mg/mL	0.1% Acetic acid	0.0125	32	33	35	71.1111	68.75	71.4286	28.8889	31.25	28.5714	29.5701	1.46346
C2-CS NP	100 mg/mL	0.1% Acetic acid	0.00625	54	55	57	98.1818	93.2203	98.2759	1.81818	6.77966	1.72414	3.44066	2.89204		C2-CS NP	100 mg/mL	0.1% Acetic acid	0.00625	40	43	45	88.8889	89.5833	91.8367	11.1111	10.4167	8.16327	9.89701	1.5411
C3-CS NP	100 mg/mL	0.1% Acetic acid	0.05	50	50	48	90.9091	84.7458	82.7586	9.09091	15.2542	17.2414	13.8622	4.24981	>5%	C3-CS NP	100 mg/mL	0.1% Acetic acid	0.05	11	12	10	24.4444	25	20.4082	75.5556	75	79.5918	76.7158	2.50616	>5%
C3-CS NP	100 mg/mL	0.1% Acetic acid	0.025	54	50	51	98.1818	84.7458	87.931	1.81818	15.2542	12.069	9.71379	7.02083		C3-CS NP	100 mg/mL	0.1% Acetic acid	0.025	26	25	23	57.7778	52.0833	46.9388	42.2222	47.9167	53.0612	47.7334	5.42183
C3-CS NP	100 mg/mL	0.1% Acetic acid	0.0125	55	56	56	100	94.9153	96.5517	0	5.08475	3.44828	2.84434	2.59561		C3-CS NP	100 mg/mL	0.1% Acetic acid	0.0125	27	26	30	60	54.1667	61.2245	40	45.8333	38.7755	41.5363	3.77138
C3-CS NP	100 mg/mL	0.1% Acetic acid	0.00625	55	57	57	100	96.6102	98.2759	0	3.38983	1.72414	1.70466	1.695		C3-CS NP	100 mg/mL	0.1% Acetic acid	0.00625	30	30	33	66.6667	62.5	67.3469	33.3333	37.5	32.6531	34.4955	2.62414
C4-CS NP	100 mg/mL	0.1% Acetic acid	0.05	45	44	40	81.8182	74.5763	68.9655	18.1818	25.4237	31.0345	24.88	6.44356	>5%	C4-CS NP	100 mg/mL	0.1% Acetic acid	0.05	30	29	28	66.6667	60.4167	57.1429	33.3333	39.5833	42.8571	38.5913	4.83879	>5%
C4-CS NP	100 mg/mL	0.1% Acetic acid	0.025	50	54	55	90.9091	91.5254	94.8276	9.09091	8.47458	5.17241	7.5793	2.10708		C4-CS NP	100 mg/mL	0.1% Acetic acid	0.025	32	31	33	71.1111	64.5833	67.3469	28.8889	35.4167	32.6531	32.3195	3.27664
C4-CS NP	100 mg/mL	0.1% Acetic acid	0.0125	55	58	57	100	98.3051	98.2759	0	1.69492	1.72414	1.13968	0.987104		C4-CS NP	100 mg/mL	0.1% Acetic acid	0.0125	35	35	37	77.7778	72.9167	75.5102	22.2222	27.0833	24.4898	24.5985	2.43238
C4-CS NP	100 mg/mL	0.1% Acetic acid	0.00625	55	58	57	100	98.3051	98.2759	0	1.69492	1.72414	1.13968	0.987104		C4-CS NP	100 mg/mL	0.1% Acetic acid	0.00625	40	43	42	88.8889	89.5833	85.7143	11.1111	10.4167	14.2857	11.9378	2.06276
C5-CS NP	100 mg/mL	0.1% Acetic acid	0.05	30	28	29	54.5455	47.4576	50	45.4545	52.5424	50	49.3323	3.59078	>5%	C5-CS NP	100 mg/mL	0.1% Acetic acid	0.05	30	28	30	66.6667	58.3333	61.2245	33.3333	41.6667	38.7755	37.9252	4.23124	>5%
C5-CS NP	100 mg/mL	0.1% Acetic acid	0.025	52	51	50	94.5455	86.4407	86.2069	5.45455	13.5593	13.7931	10.9357	4.74822		C5-CS NP	100 mg/mL	0.1% Acetic acid	0.025	31	31	33	68.8889	64.5833	67.3469	31.1111	35.4167	32.6531	33.0603	2.18147
C5-CS NP	100 mg/mL	0.1% Acetic acid	0.0125	54	56	55	98.1818	94.9153	94.8276	1.81818	5.08475	5.17241	4.02511	1.91176		C5-CS NP	100 mg/mL	0.1% Acetic acid	0.0125	33	34	36	73.3333	70.8333	73.4694	26.6667	29.1667	26.5306	27.4546	1.48421
C5-CS NP	100 mg/mL	0.1% Acetic acid	0.00625	54	55	57	98.1818	93.2203	98.2759	1.81818	6.77966	1.72414	3.44066	2.89204		C5-CS NP	100 mg/mL	0.1% Acetic acid	0.00625	35	38	39	77.7778	79.1667	79.5918	22.2222	20.8333	20.4082	21.1546	0.948735
C6-CS NP	100 mg/mL	0.1% Acetic acid	0.05	26	23	25	47.2727	38.9831	43.1034	52.7273	61.0169	56.8966	56.8803	4.14486	>5%	C6-CS NP	100 mg/mL	0.1% Acetic acid	0.05	19	16	13	42.2222	33.3333	26.5306	57.7778	66.6667	73.4694	65.9713	7.86888	>5%
C6-CS NP	100 mg/mL	0.1% Acetic acid	0.025	34	32	34	61.8182	54.2373	58.6207	38.1818	45.7627	41.3793	41.7746	3.80588		C6-CS NP	100 mg/mL	0.1% Acetic acid	0.025	22	21	25	48.8889	43.75	51.0204	51.1111	56.25	48.9796	52.1136	3.73743
C6-CS NP	100 mg/mL	0.1% Acetic acid	0.0125	40	40	42	72.7273	67.7966	72.4138	27.2727	32.2034	27.5862	29.0208	2.76068		C6-CS NP	100 mg/mL	0.1% Acetic acid	0.0125	28	27	29	62.2222	56.25	59.1837	37.7778	43.75	40.8163	40.7814	2.98626
C6-CS NP	100 mg/mL	0.1% Acetic acid	0.00625	54	54	54	98.1818	91.5254	93.1034	1.81818	8.47458	6.89655	5.72977	3.47821		C6-CS NP	100 mg/mL	0.1% Acetic acid	0.00625	30	31	33	66.6667	64.5833	67.3469	33.3333	35.4167	32.6531	33.801	1.43994
C7-CS NP	100 mg/mL	0.1% Acetic acid	0.05	40	39	41	72.7273	66.1017	70.6897	27.2727	33.8983	29.3103	30.1605	3.39361	>5%	C7-CS NP	100 mg/mL	0.1% Acetic acid	0.05	20	20	19	44.4444	41.6667	38.7755	55.5556	58.3333	61.2245	58.3711	2.83466	>5%
C7-CS NP	100 mg/mL	0.1% Acetic acid	0.025	45	48	45	81.8182	81.3559	77.5862	18.1818	18.6441	22.4138	19.7466	2.32143		C7-CS NP	100 mg/mL	0.1% Acetic acid	0.025	35	34	37	77.7778	70.8333	75.5102	22.2222	29.1667	24.4898	25.2929	3.54119
C7-CS NP	100 mg/mL	0.1% Acetic acid	0.0125	48	48	49	87.2727	81.3559	84.4828	12.7273	18.6441	15.5172	15.6295	2.96		C7-CS NP	100 mg/mL	0.1% Acetic acid	0.0125	35	35	38	77.7778	72.9167	77.551	22.2222	27.0833	22.449	23.9182	2.74345
C7-CS NP	100 mg/mL	0.1% Acetic acid	0.00625	50	50	51	90.9091	84.7458	87.931	9.09091	15.2542	12.069	12.138	3.08224		C7-CS NP	100 mg/mL	0.1% Acetic acid	0.00625	43	43	45	95.5556	89.5833	91.8367	4.44444	10.4167	8.16327	7.67479	3.01593
C8-CS NP	100 mg/mL	0.1% Acetic acid	0.05	38	38	37	69.0909	64.4068	63.7931	30.9091	35.5932	36.2069	34.2364	2.89783	>5%	C8-CS NP	100 mg/mL	0.1% Acetic acid	0.05	33	31	29	73.3333	64.5833	59.1837	26.6667	35.4167	40.8163	34.2999	7.14063	>5%
C8-CS NP	100 mg/mL	0.1% Acetic acid	0.025	50	45	48	90.9091	76.2712	82.7586	9.09091	23.7288	17.2414	16.687	7.33468		C8-CS NP	100 mg/mL	0.1% Acetic acid	0.025	35	37	36	77.7778	77.0833	73.4694	22.2222	22.9167	26.5306	23.8898	2.31319
C8-CS NP	100 mg/mL	0.1% Acetic acid	0.0125	50	51	49	90.9091	86.4407	84.4828	9.09091	13.5593	15.5172	12.7225	3.29388		C8-CS NP	100 mg/mL	0.1% Acetic acid	0.0125	36	38	39	80	79.1667	79.5918	20	20.8333	20.4082	20.4138	0.416696
C8-CS NP	100 mg/mL	0.1% Acetic acid	0.00625	53	55	57	96.3636	93.2203	98.2759	3.63636	6.77966	1.72414	4.04672	2.55262		C8-CS NP	100 mg/mL	0.1% Acetic acid	0.00625	37	40	43	82.2222	83.3333	87.7551	17.7778	16.6667	12.2449	15.5631	2.92687
C9-CS NP	100 mg/mL	0.1% Acetic acid	0.05	46	45	42	83.6364	76.2712	72.4138	16.3636	23.7288	27.5862	22.5596	5.70192	>5%	C9-CS NP	100 mg/mL	0.1% Acetic acid	0.05	21	22	19	46.6667	45.8333	38.7755	53.3333	54.1667	61.2245	56.2415	4.33547	>5%
C9-CS NP	100 mg/mL	0.1% Acetic acid	0.025	50	51	55	90.9091	86.4407	94.8276	9.09091	13.5593	5.17241	9.27421	4.19646		C9-CS NP	100 mg/mL	0.1% Acetic acid	0.025	36	34	35	80	70.8333	71.4286	20	29.1667	28.5714	25.9127	5.12919
C9-CS NP	100 mg/mL	0.1% Acetic acid	0.0125	49	55	52	89.0909	93.2203	89.6552	10.9091	6.77966	10.3448	9.34453	2.23908		C9-CS NP	100 mg/mL	0.1% Acetic acid	0.0125	40	40	43	88.8889	83.3333	87.7551	11.1111	16.6667	12.2449	13.3409	2.93546
C9-CS NP	100 mg/mL	0.1% Acetic acid	0.00625	51	55	57	92.7273	93.2203	98.2759	7.27273	6.77966	1.72414	5.25884	3.07105		C9-CS NP	100 mg/mL	0.1% Acetic acid	0.00625	40	45	45	88.8889	93.75	91.8367	11.1111	6.25	8.16327	8.50813	2.44884
C10-CS NP	100 mg/mL	0.1% Acetic acid	0.05	36	35	37	65.4545	59.322	63.7931	34.5455	40.678	36.2069	37.1434	3.17171	>5%	C10-CS NP	100 mg/mL	0.1% Acetic acid	0.05	3	3	4	6.66667	6.25	8.16327	93.3333	93.75	91.8367	92.9734	1.00615	0.05
C10-CS NP	100 mg/mL	0.1% Acetic acid	0.025	50	51	49	90.9091	86.4407	84.4828	9.09091	13.5593	15.5172	12.7225	3.29388		C10-CS NP	100 mg/mL	0.1% Acetic acid	0.025	8	7	8	17.7778	14.5833	16.3265	82.2222	85.4167	83.6735	83.7708	1.59944
C10-CS NP	100 mg/mL	0.1% Acetic acid	0.0125	54	55	55	98.1818	93.2203	94.8276	1.81818	6.77966	5.17241	4.59009	2.53148		C10-CS NP	100 mg/mL	0.1% Acetic acid	0.0125	15	15	18	33.3333	31.25	36.7347	66.6667	68.75	63.2653	66.2273	2.76862
C10-CS NP	100 mg/mL	0.1% Acetic acid	0.00625	54	54	54	98.1818	91.5254	93.1034	1.81818	8.47458	6.89655	5.72977	3.47821		C10-CS NP	100 mg/mL	0.1% Acetic acid	0.00625	14	19	18	31.1111	39.5833	36.7347	68.8889	60.4167	63.2653	64.1903	4.31119
C11-CS NP	100 mg/mL	0.1% Acetic acid	0.05	38	38	35	69.0909	64.4068	60.3448	30.9091	35.5932	39.6552	35.3858	4.37673	>5%	C11-CS NP	100 mg/mL	0.1% Acetic acid	0.05	7	7	6	15.5556	14.5833	12.2449	84.4444	85.4167	87.7551	85.8721	1.70166	>5%
C11-CS NP	100 mg/mL	0.1% Acetic acid	0.025	46	45	46	83.6364	76.2712	79.3103	16.3636	23.7288	20.6897	20.2607	3.70128		C11-CS NP	100 mg/mL	0.1% Acetic acid	0.025	13	10	13	28.8889	20.8333	26.5306	71.1111	79.1667	73.4694	74.5824	4.14151
C11-CS NP	100 mg/mL	0.1% Acetic acid	0.0125	53	54	54	96.3636	91.5254	93.1034	3.63636	8.47458	6.89655	6.33583	2.46736		C11-CS NP	100 mg/mL	0.1% Acetic acid	0.0125	20	22	28	44.4444	45.8333	57.1429	55.5556	54.1667	42.8571	50.8598	6.9652
C11-CS NP	100 mg/mL	0.1% Acetic acid	0.00625	55	58	58	100	98.3051	100	0	1.69492	0	0.564972	0.97856		C11-CS NP	100 mg/mL	0.1% Acetic acid	0.00625	21	25	29	46.6667	52.0833	59.1837	53.3333	47.9167	40.8163	47.3554	6.27735
