# Supplementary material for: A synergistic nanoformulation of propolis and chlorhexidine against Acanthamoeba: encapsulation efficiency, release kinetics, and safety evaluation
Source: PeerJ. 2025 Dec 19;13:e20493. doi: 10.7717/peerj.20493 (PMC12721124; doi:10.7717/peerj.20493)
Supplement: Supplemental Information 4 [file peerj-13-20493-s004.xlsx]

## Sheet: Samples
	CS-NPs	Combination
	C1	Propolis 1 +2 + 3
	C2	Propolis 1 + 2
	C3	Propolis 1 + 3
	C4	Propolis 2 + 3
	C5	Propolis 1
	C6	Propolis 2
	C7	Propolis 3
	C8	Propolis 1 +2 + 3 + Chlorhexidine
	C9	Propolis 1 +2 + Chlorhexidine
	C10	Propolis 1 +3 + Chlorhexidine
	C11	Propolis 2 +3 + Chlorhexidine

## Sheet: n1_Vero-p15
n1-12Jan25
Absorbance 1
Wavelength: 570 nm
	Plate 1												Plate 2															Plate 3
Plate 1	Vero																																Conc. (% propolis-loaded CS NP)	Vero (OD570 -OD 650 nm)
	C1			C2			C5			C6			C7			C8			C9			C10			C11			0.1% acetic acid						C1			C2			C5			C6			C7			C8
Abs	1	2	3	4	5	6	7	8	9	10	11	12	1	2	3	4	5	6	7	8	9	10	11	12	1	2	3	1	2	3				OD1	OD2	OD3	OD1	OD2	OD3	OD1	OD2	OD3	OD1	OD2	OD3	OD1	OD2	OD3	OD1
A	0.0463	0.0454	0.0471	0.0439	0.0461	0.0518	0.0481	0.1264	0.0677	0.0566	0.1007	0.0567	0.0924	0.1144	0.1379	0.171902	0.0745	0.121347	0.067	0.06517	0.06528	0.0901	0.1419	0.0641	0.4834	0.4881	0.4706	0.3796	0.3041	0.2889			5	0.0041	0.0034	0.0048	0.0036	0.004	0.0074	0.0059	0.0131	0.0079	0.0067	0.0152	0.0095	0.0138	0.0201	0.024	0.010102
B	0.0625	0.0574	0.0535	0.0526	0.0502	0.0715	0.1584	0.1198	0.0917	0.0462	0.0467	0.0447	0.0979	0.0924	0.0924	0.0467	0.0465	0.0476	0.0457	0.0489	0.0468	0.0716	0.0946	0.0883	0.8567	0.8541	0.8544	0.8122	0.8391	0.6974			2.5	0.0077	0.0068	0.0066	0.0077	0.0071	0.009	0.0146	0.012	0.0095	0.0027	0.005	0.0037	0.0456	0.0431	0.0422	0.0064
C	0.0489	0.0482	0.0472	0.086	0.0678	0.0551	0.0472	0.0609	0.0658	0.0458	0.045	0.0453	0.10577	0.1067	0.10658	0.0541	0.049	0.0495	0.1089	0.2059	0.1359	0.1722	0.1712	0.1744	0.8781	0.9066	0.8979						1.25	0.0066	0.0054	0.0065	0.0089	0.0076	0.0061	0.0058	0.0064	0.0076	0.005	0.0057	0.005	0.05087	0.0529	0.05588	0.0097
D	0.0701	0.0633	0.056	0.0697	0.1043	0.0969	0.077	0.0577	0.0636	0.0837	0.0896	0.09	0.2002	0.2148	0.2163	0.1184	0.1313	0.1125	0.1578	0.184	0.152092	0.18001	0.18337	0.19067	0.8344	0.8769	0.8525						0.625	0.009	0.0067	0.006	0.0076	0.0104	0.0101	0.0077	0.0061	0.0069	0.0303	0.0431	0.0402	0.1436	0.1537	0.1564	0.0633
E	0.1128	0.1148	0.1121	0.0496	0.0514	0.0591	0.0525	0.0607	0.0695	0.1857	0.2216	0.2397	0.2883	0.2609	0.2628	0.1903	0.2211	0.1891	0.3013	0.2909	0.3002	0.3095	0.2903	0.3014	0.8392	0.8026	0.8118						0.3125	0.0543	0.0606	0.0604	0.0062	0.0066	0.0078	0.0091	0.0142	0.0228	0.1212	0.1571	0.1759	0.216	0.1974	0.1868	0.1327
F	0.262	0.26199	0.261885	0.0893	0.0833	0.0813	0.1564	0.1621	0.1668	0.2554	0.254	0.2477	0.2755	0.2683	0.273371	0.2826	0.2824	0.2824	0.3139	0.3128	0.3183	0.30849	0.3214	0.30725	0.8923	0.8462	0.8084						0.15625	0.2059	0.20479	0.207185	0.0443	0.0377	0.0309	0.1032	0.1071	0.1126	0.1943	0.1937	0.1849	0.2116	0.2019	0.207271	0.2206
G	0.2856	0.289	0.2938	0.1579	0.1755	0.1799	0.2292	0.2246	0.2574	0.3098	0.30769	0.3199	0.322	0.3026	0.3043	0.296	0.29077	0.29036	0.3236	0.4498	0.3423	0.3111	0.319	0.303	0.8595	0.8258	0.8128						0.078125	0.22	0.2217	0.234	0.1069	0.1207	0.1245	0.1679	0.1663	0.1973	0.2395	0.24179	0.2599	0.256	0.2409	0.2404	0.2305
H	0.3	0.29	0.2998	0.3267	0.3112	0.30517	0.2851	0.30938	0.32912	0.33549	0.3155	0.3006	0.3248	0.32896	0.32431	0.3292	0.3273	0.33	0.4589	0.2972	0.3653	0.3211	0.321	0.312	0.8501	0.8163	0.8025						0.0390625	0.2329	0.2259	0.2402	0.2593	0.2479	0.24527	0.2217	0.24868	0.26552	0.26979	0.2523	0.2338	0.2611	0.25666	0.24761	0.2543
Wavelength: 650 nm
	Plate 1																											Plate 3					Conc. (% propolis-loaded CS NP)	Vero (%Viability)
Plate 1	Vero																																	C1					C2					C5					C6
	C1			C2			C5			C6			C7			C8			C9			C10			C11			0.1% acetic acid						1	2	3	Mean	SD	1	2	3	Mean	SD	1	2	3	Mean	SD	1
Abs	1	2	3	4	5	6	7	8	9	10	11	12	1	2	3	4	5	6	7	8	9	10	11	12	1	2	3	1	2	3			5	1.55795	1.29196	1.82394	1.55795	0.265991	1.36795	1.51995	2.81191	1.89994	0.793437	2.24193	4.97783	3.0019	3.40722	1.41227	2.54592
A	0.0422	0.042	0.0423	0.0403	0.0421	0.0444	0.0422	0.1133	0.0598	0.0499	0.0855	0.0472	0.0786	0.0943	0.1139	0.1618	0.0642	0.1106	0.0661	0.0613	0.0622	0.0817	0.1347	0.0562	0.1092	0.1285	0.1211	0.064	0.06	0.0591			2.5	2.9259	2.58391	2.50792	2.67258	0.222652	2.9259	2.69791	3.41989	3.01457	0.369064	5.54782	4.55985	3.60988	4.57251	0.96903	1.02597
B	0.0548	0.0506	0.0469	0.0449	0.0431	0.0625	0.1438	0.1078	0.0822	0.0435	0.0417	0.041	0.0523	0.0493	0.0502	0.0403	0.0407	0.0417	0.041	0.0427	0.0399	0.0426	0.0493	0.0528	0.1414	0.1479	0.1483	0.1137	0.1169	0.1082			1.25	2.50792	2.05193	2.46992	2.34326	0.253008	3.38189	2.8879	2.31792	2.86257	0.532434	2.20393	2.43192	2.8879	2.50792	0.348264	1.89994
C	0.0423	0.0428	0.0407	0.0771	0.0602	0.049	0.0414	0.0545	0.0582	0.0408	0.0393	0.0403	0.0549	0.0538	0.0507	0.0444	0.0409	0.0403	0.0464	0.0531	0.0502	0.0509	0.0531	0.0513	0.1567	0.152	0.1447						0.625	3.41989	2.54592	2.27992	2.74858	0.59639	2.8879	3.95187	3.83787	3.55921	0.58416	2.9259	2.31792	2.62191	2.62191	0.30399	11.5136
D	0.0611	0.0566	0.05	0.0621	0.0939	0.0868	0.0693	0.0516	0.0567	0.0534	0.0465	0.0498	0.0566	0.0611	0.0599	0.0551	0.049	0.0468	0.0518	0.0573	0.055	0.0547	0.0592	0.0578	0.1132	0.1093	0.1118						0.3125	20.6333	23.0272	22.9512	22.2039	1.36072	2.35592	2.50792	2.9639	2.60925	0.316403	3.45788	5.39582	8.66371	5.83914	2.63108	46.0545
E	0.0585	0.0542	0.0517	0.0434	0.0448	0.0513	0.0434	0.0465	0.0467	0.0645	0.0645	0.0638	0.0723	0.0635	0.076	0.0576	0.0622	0.0574	0.0666	0.0623	0.0671	0.0679	0.0644	0.0659	0.1209	0.1137	0.1141						0.15625	78.2394	77.8176	78.7277	78.2616	0.45544	16.8334	14.3255	11.7416	14.3002	2.54601	39.2147	40.6966	42.7866	40.8993	1.79454	73.8315
F	0.0561	0.0572	0.0547	0.045	0.0456	0.0504	0.0532	0.055	0.0542	0.0611	0.0603	0.0628	0.0639	0.0664	0.0661	0.062	0.0648	0.0649	0.0627	0.0669	0.0652	0.0656	0.0764	0.061	0.1176	0.1136	0.1097						0.078125	83.5972	84.2432	88.917	85.5858	2.90295	40.6206	45.8645	47.3084	44.5978	3.51921	63.7999	63.1919	74.9715	67.3211	6.63242	91.007
G	0.0656	0.0673	0.0598	0.051	0.0548	0.0554	0.0613	0.0583	0.0601	0.0703	0.0659	0.06	0.066	0.0617	0.0639	0.0655	0.0601	0.0691	0.0631	0.0737	0.065	0.0656	0.0644	0.0659	0.1189	0.1123	0.1124						0.0390625	88.4991	85.8391	91.273	88.537	2.71711	98.5307	94.1989	93.1995	95.3097	2.83389	84.2432	94.4953	100.894	93.2109	8.39949	102.517
H	0.0671	0.0641	0.0596	0.0674	0.0633	0.0599	0.0634	0.0607	0.0636	0.0657	0.0632	0.0668	0.0637	0.0723	0.0767	0.0749	0.0698	0.07	0.0702	0.0597	0.0687	0.0644	0.0659	0.0656	0.1157	0.1098	0.109						0.1% Acetic acid	0.263167
[truncated: 29 more columns]

## Sheet: n2_Vero-p16
n2-20Jan25
Absorbance 1
Wavelength: 570 nm
	Plate 1												Plate 2															Plate 3
Plate 1	Vero																																Conc. (% propolis-loaded CS NP)	Vero (OD570 -OD 650 nm)
	C1			C2			C5			C6			C7			C8			C9			C10			C11			0.1% acetic acid						C1			C2			C5			C6			C7			C8
Abs	1	2	3	4	5	6	7	8	9	10	11	12	1	2	3	4	5	6	7	8	9	10	11	12	4	5	6	1	2	3				OD1	OD2	OD3	OD1	OD2	OD3	OD1	OD2	OD3	OD1	OD2	OD3	OD1	OD2	OD3	OD1
A	0.0992	0.0702	0.0631	0.1218	0.0736	0.0795	0.0704	0.20263	0.11061	0.0826	0.0721	0.08	0.216	0.2165	0.22616	0.0545	0.2481	0.0543	0.068	0.06	0.06531	0.0764	0.09	0.1625	0.4228	0.42989	0.4158	0.9854	1.0214	0.9796			5	0.0208	0.013	0.0108	0.0206	0.0138	0.0155	0.0151	0.00333	0.01681	0.0172	0.0169	0.0196	0.0657	0.082	0.11396	0.0094
B	0.067	0.077	0.063	0.1025	0.1	0.1378	0.0625	0.0752	0.0613	0.0652	0.06	0.067	0.2712	0.27999	0.28059	0.0693	0.0749	0.0535	0.0581	0.0603	0.0663	0.1623	0.1688	0.1604	0.78019	0.7771	0.7633	0.6911	0.7179	0.588			2.5	0.0124	0.0145	0.0111	0.017	0.0156	0.0238	0.0092	0.0128	0.0109	0.013	0.0107	0.0128	0.1097	0.14649	0.13739	0.0148
C	0.1094	0.115	0.11772	0.1807	0.1311	0.1528	0.1216	0.1035	0.0691	0.0853	0.077	0.0668	0.32406	0.3263	0.319933	0.1004	0.10952	0.0943	0.3221	0.3324	0.3246	0.4414	0.4536	0.45227	0.78621	0.7749	0.7732						1.25	0.0237	0.0419	0.04272	0.0239	0.0182	0.0231	0.0166	0.014	0.0101	0.0189	0.0144	0.0128	0.15706	0.154	0.164233	0.049
D	0.1573	0.152177	0.172162	0.1125	0.0824	0.099	0.1115	0.0789	0.0757	0.132	0.1721	0.138	0.689	0.645	0.652149	0.3293	0.3211	0.32907	0.4589	0.45	0.4506	0.5517	0.53391	0.55	0.7248	0.7608	0.7808						0.625	0.0715	0.068277	0.062062	0.0194	0.0146	0.0172	0.027	0.0209	0.0243	0.0712	0.1243	0.0625	0.4698	0.424	0.445949	0.2427
E	0.3277	0.327348	0.327378	0.0796	0.1153	0.1276	0.12369	0.13213	0.14356	0.4926	0.6889	0.6882	0.7993	0.7766	0.72447	0.5668	0.5823	0.5682	0.8391	0.8971	0.9086	0.8511	0.84976	0.84088	0.7772	0.7416	0.7435						0.3125	0.2078	0.200148	0.201178	0.0264	0.053	0.0569	0.04509	0.04513	0.03756	0.3887	0.5707	0.564	0.6201	0.6054	0.54527	0.4368
F	0.871	0.876133	0.876146	0.3014	0.30931	0.30417	0.5385	0.5381	0.5122	0.82375	0.81788	0.73551	0.83654	0.82713	0.82135	0.7653	0.81671	0.82675	1.029	1.02262	1.0967	0.92399	0.91872	0.91797	0.7596	0.7225	0.7349						0.15625	0.709	0.719433	0.718446	0.2157	0.20281	0.19947	0.4039	0.3972	0.3609	0.66445	0.64748	0.55421	0.65654	0.65663	0.65095	0.607
G	0.94115	0.9415	0.9049	0.5623	0.5183	0.552	0.7815	0.7487	0.74233	0.88	0.883925	0.874676	0.98197	0.98896	0.9645	0.856	0.89144	0.8994	1.1689	1.1664	1.2066	0.95	0.945	0.944	0.7293	0.7174	0.7435						0.078125	0.74795	0.7628	0.7048	0.4231	0.3559	0.3991	0.6282	0.5849	0.57073	0.6927	0.704925	0.692676	0.80057	0.81406	0.7796	0.6664
H	1.0284	1.0749	1.0204	0.982	0.9823	0.98148	0.939	0.93386	0.93455	0.9375	0.9108	0.95099	0.99826	0.9848	0.982408	0.9691	0.9993	0.977	1.2026	1.1321	1.1581	0.99	0.98	0.975	0.719	0.6218	0.6886						0.0390625	0.8405	0.8977	0.8435	0.8227	0.8146	0.80618	0.767	0.75856	0.74255	0.7495	0.7255	0.75299	0.82196	0.8069	0.800108	0.7872
Wavelength: 650 nm
	Plate 1																											Plate 3					Conc. (% propolis-loaded CS NP)	Vero (%Viability)
Plate 1	Vero																																	C1					C2					C5					C6
	C1			C2			C5			C6			C7			C8			C9			C10			C11			0.1% acetic acid						1	2	3	Mean	SD	1	2	3	Mean	SD	1	2	3	Mean	SD	1
Abs	1	2	3	4	5	6	7	8	9	10	11	12	1	2	3	4	5	6	7	8	9	10	11	12	4	5	6	1	2	3			5	2.41757	1.51098	1.25528	1.72795	0.610767	2.39433	1.60397	1.80156	1.93328	0.411317	1.75507	0.387044	1.95382	1.36531	0.853011	1.99915
A	0.0784	0.0572	0.0523	0.1012	0.0598	0.064	0.0553	0.1993	0.0938	0.0654	0.0552	0.0604	0.1503	0.1345	0.1122	0.0451	0.2329	0.0457	0.0442	0.0446	0.0482	0.0565	0.0569	0.1481	0.1081	0.072	0.0795	0.1333	0.139	0.133			2.5	1.44125	1.68533	1.29015	1.47224	0.199405	1.9759	1.81318	2.76626	2.18511	0.509822	1.06931	1.48774	1.2669	1.27465	0.209321	1.51098
B	0.0546	0.0625	0.0519	0.0855	0.0844	0.114	0.0533	0.0624	0.0504	0.0522	0.0493	0.0542	0.1615	0.1335	0.1432	0.0545	0.059	0.0438	0.0463	0.0474	0.0491	0.0725	0.069	0.0624	0.1405	0.1268	0.1219	0.0996	0.1024	0.0905			1.25	2.75464	4.87002	4.96532	4.19666	1.24974	2.77789	2.11538	2.6849	2.52605	0.358683	1.92941	1.62721	1.17392	1.57685	0.380256	2.19674
C	0.0857	0.0731	0.075	0.1568	0.1129	0.1297	0.105	0.0895	0.059	0.0664	0.0626	0.054	0.167	0.1723	0.1557	0.0514	0.0639	0.0464	0.0606	0.0589	0.0737	0.0662	0.0885	0.0908	0.1363	0.1253	0.1208						0.625	8.31041	7.9358	7.21344	7.81988	0.557598	2.25485	1.69695	1.99915	1.98365	0.279274	3.1382	2.4292	2.82438	2.79726	0.355277	8.27554
D	0.0858	0.0839	0.1101	0.0931	0.0678	0.0818	0.0845	0.058	0.0514	0.0608	0.0478	0.0755	0.2192	0.221	0.2062	0.0866	0.1162	0.0955	0.124	0.1213	0.1403	0.1221	0.1534	0.1578	0.1048	0.1345	0.1393						0.3125	24.1525	23.2631	23.3828	23.5995	0.482656	3.06846	6.16016	6.61346	5.28069	1.92921	5.24079	5.24544	4.36558	4.9506	0.506649	45.1784
E	0.1199	0.1272	0.1262	0.0532	0.0623	0.0707	0.0786	0.087	0.106	0.1039	0.1182	0.1242	0.1792	0.1712	0.1792	0.13	0.1414	0.1272	0.1529	0.1559	0.1621	0.1552	0.1666	0.1629	0.1148	0.1074	0.1053						0.15625	82.4067	83.6193	83.5046	83.1769	0.669453	25.0707	23.5725	23.1843	23.9425	0.996145	46.9451	46.1664	41.9472	45.0196	2.68906	77.2287
F	0.162	0.1567	0.1577	0.0857	0.1065	0.1047	0.1346	0.1409	0.1513	0.1593	0.1704	0.1813	0.18	0.1705	0.1704	0.1583	0.1638	0.1663	0.1768	0.1706	0.1617	0.1678	0.1622	0.1654	0.1058	0.1048	0.1036						0.078125	86.9339	88.6599	81.9186	85.8374	3.50185	49.1767	41.3661	46.3872	45.6433	3.95809	73.0154	67.9826	66.3357	69.1112	3.47993	80.5122
G	0.1932	0.1787	0.2001	0.1392	0.1624	0.1529	0.1533	0.1638	0.1716	0.1873	0.179	0.182	0.1814	0.1749	0.1849	0.1896	0.1801	0.1692	0.181	0.1686	0.1645	0.15	0.173	0.1435	0.1035	0.1073	0.1081						0.0390625	97.6909	104.339	98.0396	100.023	3.74182	95.622	94.6806	93.7019	94.6682	0.960116	89.148	88.1671	86.3062	87.8738	1.44343	87.114
H	0.1879	0.1772	0.1769	0.1593	0.1677	0.1753	0.172	0.1753	0.192	0.188	0.1853	0.198	0.1763	0.1779	0.1823	0.1819	0.174	0.1615	0.1855	0.1647	0.1672	0.16	0.15	0.1567	0.1036	0.0922	0.1022						0.1% Acetic acid	0.860367
[truncated: 29 more columns]

## Sheet: n3_Vero-p19
n3-02Feb25
Absorbance 1
Wavelength: 570 nm
	Plate 1												Plate 2															Plate 3
Plate 1	Vero																																Conc. (% propolis-loaded CS NP)	Vero (OD570 -OD 650 nm)
	C1			C2			C5			C6			C7			C8			C9			C10			C11			0.1% acetic acid						C1			C2			C5			C6			C7			C8
Abs	1	2	3	4	5	6	7	8	9	10	11	12	1	2	3	4	5	6	7	8	9	10	11	12	7	8	9	1	2	3				OD1	OD2	OD3	OD1	OD2	OD3	OD1	OD2	OD3	OD1	OD2	OD3	OD1	OD2	OD3	OD1
A	0.0722	0.0645	0.0614	0.198138	0.14052	0.0513	0.0966	0.1344	0.1138	0.102	0.18	0.1325	0.1297	0.157	0.0788	0.0672	0.1049	0.0704	0.048	0.0841	0.047	0.052	0.1457	0.0629	0.38618	0.38119	0.3675	0.4579	0.392	0.4012			5	0.008	0.0081	0.007	0.004738	0.00382	0.0057	0.0096	0.0105	0.0104	0.0123	0.0153	0.0111	0.0426	0.0343	0.0275	0.0075
B	0.0518	0.0565	0.0527	0.1562	0.0882	0.067	0.1681	0.0766	0.093	0.1671	0.1185	0.049	0.2295	0.1782	0.1861	0.0677	0.0561	0.0591	0.0537	0.0498	0.0483	0.1508	0.15845	0.15898	0.7547	0.7009	0.7079	0.6237	0.635	0.6814			2.5	0.0066	0.006	0.0068	0.017	0.0089	0.0081	0.0139	0.0069	0.0097	0.0177	0.0136	0.006	0.0426	0.0412	0.0423	0.0089
C	0.0554	0.055	0.0525	0.0889	0.1083	0.0549	0.0785	0.0627	0.0563	0.0851	0.0531	0.0508	0.1413	0.1489	0.1185	0.0599	0.0566	0.0574	0.1555	0.1589	0.1534	0.20779	0.20879	0.204	0.7695	0.6915	0.7032						1.25	0.0076	0.0069	0.0069	0.0103	0.0089	0.0074	0.0079	0.0045	0.0051	0.011	0.0059	0.006	0.0509	0.0641	0.0617	0.0166
D	0.0594	0.0666	0.0714	0.05	0.0552	0.0507	0.0533	0.0503	0.0458	0.08542	0.08518	0.08442	0.2813	0.2878	0.2835	0.131	0.1295	0.1355	0.1965	0.1952	0.1962	0.226	0.2206	0.2414	0.7731	0.8196	0.7426						0.625	0.0165	0.0193	0.0246	0.0041	0.0052	0.0051	0.0057	0.0046	0.0043	0.03592	0.03808	0.04312	0.2101	0.2121	0.2021	0.0804
E	0.1549	0.15038	0.15242	0.0511	0.0525	0.0528	0.0488	0.0473	0.049	0.18506	0.18517	0.18637	0.3376	0.3311	0.3273	0.2613	0.2596	0.2481	0.3637	0.368	0.3685	0.3753	0.37	0.3863	0.7406	0.7397	0.8081						0.3125	0.095	0.08598	0.08682	0.0083	0.0082	0.0113	0.0064	0.0057	0.0056	0.13976	0.14317	0.14287	0.2454	0.2415	0.2302	0.1994
F	0.3692	0.34206	0.3645	0.1051	0.1065	0.1276	0.1445	0.2138	0.2149	0.2894	0.2956	0.2884	0.38	0.374417	0.364413	0.3283	0.3596	0.3886	0.4271	0.4267	0.4375	0.4069	0.4043	0.412	0.7304	0.717	0.8016						0.15625	0.2926	0.25966	0.2902	0.0559	0.0428	0.0708	0.0931	0.1518	0.1498	0.2293	0.2305	0.2199	0.2757	0.284317	0.275713	0.2549
G	0.3804	0.3844	0.384064	0.2306	0.2588	0.2659	0.31513	0.3141	0.3054	0.3502	0.355	0.354813	0.4071	0.4072	0.4094	0.3573	0.381	0.3869	0.4417	0.4665	0.4738	0.42	0.426	0.422	0.71	0.7236	0.6862						0.078125	0.2873	0.2977	0.299064	0.1668	0.1893	0.1966	0.23683	0.2313	0.2235	0.2813	0.2811	0.273913	0.3156	0.3177	0.3136	0.2783
H	0.4219	0.4234	0.4296	0.39549	0.4142	0.397	0.4296	0.4298	0.4398	0.4091	0.40897	0.39607	0.4135	0.41083	0.4129	0.42	0.41453	0.40246	0.4906	0.4995	0.4958	0.4213	0.419899	0.43551	0.6569	0.644	0.6294						0.0390625	0.3276	0.3339	0.3393	0.32749	0.3396	0.3148	0.3382	0.3457	0.3548	0.3178	0.31597	0.30957	0.3249	0.32543	0.3282	0.3374
Wavelength: 650 nm
	Plate 1																											Plate 3					Conc. (% propolis-loaded CS NP)	Vero (%Viability)
Plate 1	Vero																																	C1					C2					C5					C6
	C1			C2			C5			C6			C7			C8			C9			C10			C11			0.1% acetic acid						1	2	3	Mean	SD	1	2	3	Mean	SD	1	2	3	Mean	SD	1
Abs	1	2	3	4	5	6	7	8	9	10	11	12	1	2	3	4	5	6	7	8	9	10	11	12	7	8	9	1	2	3			5	2.35849	2.38797	2.06368	2.27005	0.179327	1.39682	1.12618	1.68042	1.40114	0.277148	2.83019	3.09552	3.06604	2.99725	0.145427	3.62618
A	0.0642	0.0564	0.0544	0.1934	0.1367	0.0456	0.087	0.1239	0.1034	0.0897	0.1647	0.1214	0.0871	0.1227	0.0513	0.0597	0.0953	0.0604	0.042	0.0835	0.0468	0.0456	0.1329	0.0554	0.099	0.0862	0.063	0.0813	0.0783	0.0739			2.5	1.94575	1.76887	2.00472	1.90645	0.12274	5.01179	2.62382	2.38797	3.34119	1.45158	4.09788	2.0342	2.85967	2.99725	1.0387	5.21816
B	0.0452	0.0505	0.0459	0.1392	0.0793	0.0589	0.1542	0.0697	0.0833	0.1494	0.1049	0.043	0.1869	0.137	0.1438	0.0588	0.0484	0.0523	0.0479	0.0435	0.0419	0.133	0.0724	0.0765	0.1169	0.117	0.0733	0.0939	0.0943	0.0977			1.25	2.24057	2.0342	2.0342	2.10299	0.119147	3.03656	2.62382	2.1816	2.61399	0.427561	2.32901	1.32665	1.50354	1.71973	0.53501	3.24292
C	0.0478	0.0481	0.0456	0.0786	0.0994	0.0475	0.0706	0.0582	0.0512	0.0741	0.0472	0.0448	0.0904	0.0848	0.0568	0.0433	0.0424	0.0405	0.0471	0.0506	0.0427	0.0573	0.0518	0.0553	0.1139	0.1017	0.1354						0.625	4.86439	5.68986	7.25236	5.93553	1.21279	1.20873	1.53302	1.50354	1.41509	0.179327	1.68042	1.35613	1.26769	1.43475	0.217309	10.5896
D	0.0429	0.0473	0.0468	0.0459	0.05	0.0456	0.0476	0.0457	0.0415	0.0495	0.0471	0.0413	0.0712	0.0757	0.0814	0.0506	0.0478	0.0497	0.0592	0.0564	0.0627	0.0657	0.0703	0.065	0.1216	0.1331	0.1131						0.3125	28.0071	25.3479	25.5955	26.3168	1.46903	2.44693	2.41745	3.33137	2.73192	0.519348	1.88679	1.68042	1.65094	1.73939	0.128505	41.2028
E	0.0599	0.0644	0.0656	0.0428	0.0443	0.0415	0.0424	0.0416	0.0434	0.0453	0.042	0.0435	0.0922	0.0896	0.0971	0.0619	0.0673	0.0632	0.0699	0.0776	0.0791	0.0846	0.0879	0.0872	0.108	0.1075	0.1305						0.15625	86.2618	76.5507	85.5542	82.7889	5.41402	16.48	12.6179	20.8726	16.6568	4.1302	27.4469	44.7524	44.1627	38.7873	9.82551	67.6002
F	0.0766	0.0824	0.0743	0.0492	0.0637	0.0568	0.0514	0.062	0.0651	0.0601	0.0651	0.0685	0.1043	0.0901	0.0887	0.0734	0.077	0.0788	0.0846	0.0811	0.085	0.0983	0.0857	0.0922	0.102	0.1015	0.1344						0.078125	84.6993	87.7653	88.1675	86.8774	1.89695	49.1745	55.8078	57.9599	54.3141	4.5792	69.8202	68.1899	65.8903	67.9668	1.97439	82.9304
G	0.0931	0.0867	0.085	0.0638	0.0695	0.0693	0.0783	0.0828	0.0819	0.0689	0.0739	0.0809	0.0915	0.0895	0.0958	0.079	0.0807	0.0795	0.0824	0.0819	0.0839	0.0911	0.0891	0.0912	0.1032	0.1003	0.0993						0.0390625	96.5802	98.4375	100.029	98.3491	1.72635	96.5478	100.118	92.8066	96.4908	3.65599	99.7052	101.916	104.599	102.074	2.45072	93.691
H	0.0943	0.0895	0.0903	0.068	0.0746	0.0822	0.0914	0.0841	0.085	0.0913	0.093	0.0865	0.0886	0.0854	0.0847	0.0826	0.0794	0.081	0.0847	0.0863	0.0838	0.0915	0.0917	0.0928	0.0955	0.0918	0.0903						0.1% Acetic acid	0.3392
[truncated: 29 more columns]

## Sheet: MCC-3n
Vero-p15	Conc. (% propolis-loaded CS NP)	Vero (%Viability)
		C1					C2					C5					C6					C7					C8					C9					C10					C11
		1	2	3	Mean	SD	1	2	3	Mean	SD	1	2	3	Mean	SD	1	2	3	Mean	SD	1	2	3	Mean	SD	1	2	3	Mean	SD	1	2	3	Mean	SD	1	2	3	Mean	SD	1	2	3	Mean	SD
	5	1.55795	1.29196	1.82394	1.55795	0.265991	1.36795	1.51995	2.81191	1.89994	0.793437	2.24193	4.97783	3.0019	3.40722	1.41227	2.54592	5.77581	3.60988	3.9772	1.64598	5.24383	7.63775	9.1197	7.33376	1.95574	3.83863	3.91387	4.08372	3.94541	0.125553	0.341989	1.47055	1.17036	0.9943	0.584518	3.19189	2.73591	3.0019	2.97657	0.229045	55.8535	53.6743	52.1668	53.8982	1.85354
	2.5	2.9259	2.58391	2.50792	2.67258	0.222652	2.9259	2.69791	3.41989	3.01457	0.369064	5.54782	4.55985	3.60988	4.57251	0.96903	1.02597	1.89994	1.40595	1.44395	0.438223	17.3274	16.3775	16.0355	16.5801	0.669396	2.43192	2.20393	2.24193	2.29259	0.122149	1.78594	2.35592	2.62191	2.25459	0.427099	11.0196	17.2134	13.4896	13.9075	3.11798	106.767	105.408	105.393	105.856	0.788545
	1.25	2.50792	2.05193	2.46992	2.34326	0.253008	3.38189	2.8879	2.31792	2.86257	0.532434	2.20393	2.43192	2.8879	2.50792	0.348264	1.89994	2.16593	1.89994	1.9886	0.15357	19.33	20.1013	21.2337	20.2217	0.957556	3.68588	3.0779	3.49588	3.41989	0.311033	23.7492	58.0621	32.5649	38.1254	17.8194	46.0925	44.8765	46.7764	45.9151	0.962301	107.677	112.632	112.424	110.911	2.80267
	0.625	3.41989	2.54592	2.27992	2.74858	0.59639	2.8879	3.95187	3.83787	3.55921	0.58416	2.9259	2.31792	2.62191	2.62191	0.30399	11.5136	16.3775	15.2755	14.3889	2.55026	54.5662	58.4041	59.43	57.4668	2.56381	24.0532	31.273	24.9652	26.7638	3.9316	40.2787	48.1444	36.8937	41.7723	5.77213	47.6162	47.183	50.4889	48.4294	1.79671	107.647	114.573	110.558	110.926	3.47751
	0.3125	20.6333	23.0272	22.9512	22.2039	1.36072	2.35592	2.50792	2.9639	2.60925	0.316403	3.45788	5.39582	8.66371	5.83914	2.63108	46.0545	59.696	66.8398	57.5301	10.5606	82.0773	75.0095	70.9816	76.0228	5.61679	50.4243	60.38	50.0443	53.6162	5.86068	89.183	86.8651	88.575	88.2077	1.20183	91.8049	85.8391	89.487	89.0437	3.00751	107.214	102.826	104.14	104.727	2.25228
	0.15625	78.2394	77.8176	78.7277	78.2616	0.45544	16.8334	14.3255	11.7416	14.3002	2.54601	39.2147	40.6966	42.7866	40.8993	1.79454	73.8315	73.6035	70.2597	72.5649	1.99966	80.4053	76.7194	78.7604	78.6284	1.84648	83.8252	82.6852	82.6472	83.0526	0.669396	95.4528	93.4389	96.1748	95.0222	1.41788	92.2951	93.0969	93.5719	92.988	0.645311	115.633	109.349	104.289	109.757	5.68292
	0.078125	83.5972	84.2432	88.917	85.5858	2.90295	40.6206	45.8645	47.3084	44.5978	3.51921	63.7999	63.1919	74.9715	67.3211	6.63242	91.007	91.8771	98.7587	93.8809	4.24662	97.2768	91.5389	91.349	93.3882	3.36891	87.5871	87.6517	84.076	86.4383	2.04603	98.9867	142.913	105.37	115.757	23.7338	93.2869	96.7448	90.095	93.3756	3.32578	110.543	106.498	104.543	107.194	3.06019
	0.0390625	88.4991	85.8391	91.273	88.537	2.71711	98.5307	94.1989	93.1995	95.3097	2.83389	84.2432	94.4953	100.894	93.2109	8.39949	102.517	95.8708	88.841	95.7429	6.83877	99.2147	97.5275	94.0887	96.9436	2.61242	96.6308	97.8467	98.7967	97.7581	1.08568	147.701	90.247	112.704	116.884	28.9542	97.5427	96.9348	93.6289	96.0355	2.10622	109.617	105.453	103.513	106.194	3.11918
	0.1% Acetic acid	0.263167																																								0.669967
Vero-p16	Conc. (% propolis-loaded CS NP)	Vero (%Viability)
		C1					C2					C5					C6					C7					C8					C9					C10					C11
		1	2	3	Mean	SD	1	2	3	Mean	SD	1	2	3	Mean	SD	1	2	3	Mean	SD	1	2	3	Mean	SD	1	2	3	Mean	SD	1	2	3	Mean	SD	1	2	3	Mean	SD	1	2	3	Mean	SD
	5	2.41757	1.51098	1.25528	1.72795	0.610767	2.39433	1.60397	1.80156	1.93328	0.411317	1.75507	0.387044	1.95382	1.36531	0.853011	1.99915	1.96428	2.2781	2.08051	0.172004	7.63628	9.53082	13.2455	10.1375	2.85341	1.09256	1.76669	0.999574	1.28627	0.418641	2.76626	1.78993	1.98869	2.18163	0.515969	2.31297	3.8472	1.67371	2.61129	1.11703	55.3887	62.9903	59.1904	59.1898	3.80082
	2.5	1.44125	1.68533	1.29015	1.47224	0.199405	1.9759	1.81318	2.76626	2.18511	0.509822	1.06931	1.48774	1.2669	1.27465	0.209321	1.51098	1.24366	1.48774	1.41413	0.148088	12.7504	17.0265	15.9688	15.2485	2.22717	1.7202	1.84805	1.12743	1.56522	0.384495	1.37151	1.49936	1.99915	1.62334	0.331679	10.4374	11.5997	11.3905	11.1425	0.619552	112.588	114.456	112.889	113.311	1.00262
	1.25	2.75464	4.87002	4.96532	4.19666	1.24974	2.77789	2.11538	2.6849	2.52605	0.358683	1.92941	1.62721	1.17392	1.57685	0.380256	2.19674	1.67371	1.48774	1.78606	0.367611	18.255	17.8993	19.0887	18.4144	0.610491	5.69525	5.30239	5.56739	5.52168	0.200378	30.394	31.7888	29.162	30.4483	1.31423	43.6093	42.4354	42.0135	42.6861	0.826919	114.387	114.333	114.825	114.515	0.270156
	0.625	8.31041	7.9358	7.21344	7.81988	0.557598	2.25485	1.69695	1.99915	1.98365	0.279274	3.1382	2.4292	2.82438	2.79726	0.355277	8.27554	14.4473	7.26434	9.99574	3.8882	54.6046	49.2813	51.8324	51.9061	2.66242	28.2089	23.8154	27.1477	26.3907	2.29249	38.9253	38.2046	36.066	37.732	1.48707	49.9322	44.2265	45.5852	46.5813	2.98042	109.123	110.232	112.907	110.754	1.94534
	0.3125	24.1525	23.2631	23.3828	23.5995	0.482656	3.06846	6.16016	6.61346	5.28069	1.92921	5.24079	5.24544	4.36558	4.9506	0.506649	45.1784	66.3322	65.5534	59.0213	11.9947	72.0739	70.3653	63.3765	68.6052	4.60813	50.7691	51.2456	51.2572	51.0906	0.278547	79.7567	86.1493	86.7653	84.2238	3.88085	80.8841	79.4034	78.8013	79.6963	1.07186	116.586	111.622	112.326	113.511	2.68552
	0.15625	82.4067	83.6193	83.5046	83.1769	0.669453	25.0707	23.5725	23.1843	23.9425	0.996145	46.9451	46.1664	41.9472	45.0196	2.68906	77.2287	75.2563	64.4156	72.3002	6.89913	76.3093	76.3198	75.6596	76.0962	0.378174	70.5513	75.8874	76.7638	74.4008	3.36246	99.0508	99.0299	108.675	102.252	5.56236	87.8916	87.93	87.4708	87.7641	0.254716	115.072	108.718	111.112	111.634	3.20891
	0.078125	86.9339	88.6599	81.9186	85.8374	3.50185	49.1767	41.3661	46.3872	45.6433	3.95809	73.0154	67.9826	66.3357	69.1112	3.47993	80.5122	81.9331	80.5094	80.9849	0.821167	93.0499	94.6178	90.6125	92.7601	2.0183	77.4553	82.6787	84.8708	81.6683	3.80958	114.823	115.974	121.123	117.307	3.35463	92.9836	89.7292	93.0417	91.9182	1.89594	110.144	107.38	111.833	109.786	2.24793
	0.0390625	97.6909	104.339	98.0396	100.023	3.74182	95.622	94.6806	93.7019	94.6682	0.960116	89.148	88.1671	86.3062	87.8738	1.44343	87.114	84.3245	87.5197	86.3194	1.73949	95.536	93.7856	92.9962	94.1059	1.29987	91.4959	95.9242	94.7852	94.0684	2.29953	118.217	112.44	115.172	115.276	2.88972	96.4705	96.4705	95.1106	96.0172	0.78513	108.313	93.2121	103.209	101.578	7.68158
	0.1% Acetic acid	0.860367																																								0.568167
Vero-p19	Conc. (% propolis-loaded CS NP)	Vero (%Viability)
		C1					C2					C5					C6					C7					C8					C9					C10					C11
		1	2	3	Mean	SD	1	2	3	Mean	SD	1	2	3	Mean	SD	1	2	3	Mean	SD	1	2	3	Mean	SD	1	2	3	Mean	SD	1	2	3	Mean	SD	1	2	3	Mean	SD	1	2	3	Mean	SD
	5	2.35849	2.38797	2.06368	2.27005	0.179327	1.39682	1.12618	1.68042	1.40114	0.277148	2.83019	3.09552	3.06604	2.99725	0.145427	3.62618	4.51061	3.27241	3.80307	0.637774	12.559	10.112	8.10731	10.2594	2.22948	2.21108	2.83019	2.94811	2.66313	0.395897	1.76887	0.176887	0.0589623	0.668239	0.954995	1.88679	3.77358	2.21108	2.62382	1.00884	52.082	53.4984	55.2231	53.6011	1.57307
	2.5	1.94575	1.76887	2.00472	1.90645	0.12274	5.01179	2.62382	2.38797	3.34119	1.45158	4.09788	2.0342	2.85967	2.99725	1.0387	5.21816	4.00943	1.76887	3.66549	1.75018	12.559	12.1462	12.4705	12.3919	0.217309	2.62382	2.27005	2.00472	2.29953	0.310603	1.70991	1.85731	1.88679	1.818	0.0947686	5.24764	25.3685	24.316	18.3107	11.3252	115.669	105.894	115.089	112.217	5.48382
	1.25	2.24057	2.0342	2.0342	2.10299	0.119147	3.03656	2.62382	2.1816	2.61399	0.427561	2.32901	1.32665	1.50354	1.71973	0.53501	3.24292	1.73939	1.76887	2.25039	0.859684	15.0059	18.8974	18.1899	17.3644	2.07292	4.89387	4.18632	4.98231	4.6875	0.436281	31.9575	31.9281	32.6356	32.1737	0.400264	44.3662	46.2824	43.8384	44.829	1.28606	118.897	106.964	102.974	109.612	8.2852
	0.625	4.86439	5.68986	7.25236	5.93553	1.21279	1.20873	1.53302	1.50354	1.41509	0.179327	1.68042	1.35613	1.26769	1.43475	0.217309	10.5896	11.2264	12.7123	11.5094	1.08926	61.9399	62.5295	59.5814	61.3502	1.55999	23.7028	24.0861	25.2948	24.3612	0.830894	40.4776	40.9198	39.3573	40.2516	0.805398	47.2583	44.3101	52.0047	47.8577	3.88216	118.154	124.501	114.164	118.94	5.21328
	0.3125	28.0071	25.3479	25.5955	26.3168	1.46903	2.44693	2.41745	3.33137	2.73192	0.519348	1.88679	1.68042	1.65094	1.73939	0.128505	41.2028	42.2081	42.1197	41.8436	0.556642	72.3467	71.1969	67.8656	70.4697	2.32739	58.7854	56.6922	54.5106	56.6627	2.13753	86.6156	85.6132	85.3184	85.8491	0.679986	85.7017	83.1663	88.1781	85.682	2.50595	114.726	114.654	122.887	117.422	4.73286
	0.15625	86.2618	76.5507	85.5542	82.7889	5.41402	16.48	12.6179	20.8726	16.6568	4.1302	27.4469	44.7524	44.1627	38.7873	9.82551	67.6002	67.954	64.829	66.7944	1.71126	81.2795	83.8199	81.2833	82.1276	1.46559	75.1474	83.3137	91.3325	83.2645	8.09268	100.973	101.887	103.921	102.26	1.50912	90.9788	93.9269	94.2807	93.0621	1.81287	113.964	111.625	121.001	115.53	4.88022
	0.078125	84.6993	87.7653	88.1675	86.8774	1.89695	49.1745	55.8078	57.9599	54.3141	4.5792	69.8202	68.1899	65.8903	67.9668	1.97439	82.9304	82.8715	80.7527	82.1848	1.24067	93.0425	93.6616	92.4528	93.0523	0.604423	82.046	88.5318	90.625	87.0676	4.47301	105.926	113.384	114.947	111.419	4.82107	96.9634	99.3219	97.5236	97.9363	1.23223	110.047	113.04	106.438	109.842	3.30549
	0.0390625	96.5802	98.4375	100.029	98.3491	1.72635	96.5478	100.118	92.8066	96.4908	3.65599	99.7052	101.916	104.599	102.074	2.45072	93.691	93.1515	91.2647	92.7024	1.27397	95.7842	95.9404	96.7571	96.1606	0.52246	99.4693	98.8001	94.77	97.6798	2.54207	119.664	121.816	121.462	120.981	1.15404	97.2288	96.7568	101.035	98.3401	2.34556	101.814	100.145	97.7693	99.9093	2.03241
	0.1% Acetic acid	0.3392																																								0.5514
